# Supplementary material for: Integrated genetic and pharmacologic interrogation of rare cancers
Source: PubMed Central journal article supplement (PMC4917959; doi:10.1038/ncomms11987), 2016-06-22
Supplement: ncomms11987-s1.pdf [file ncomms11987-s1.pdf]

## Supplementary Figure 1

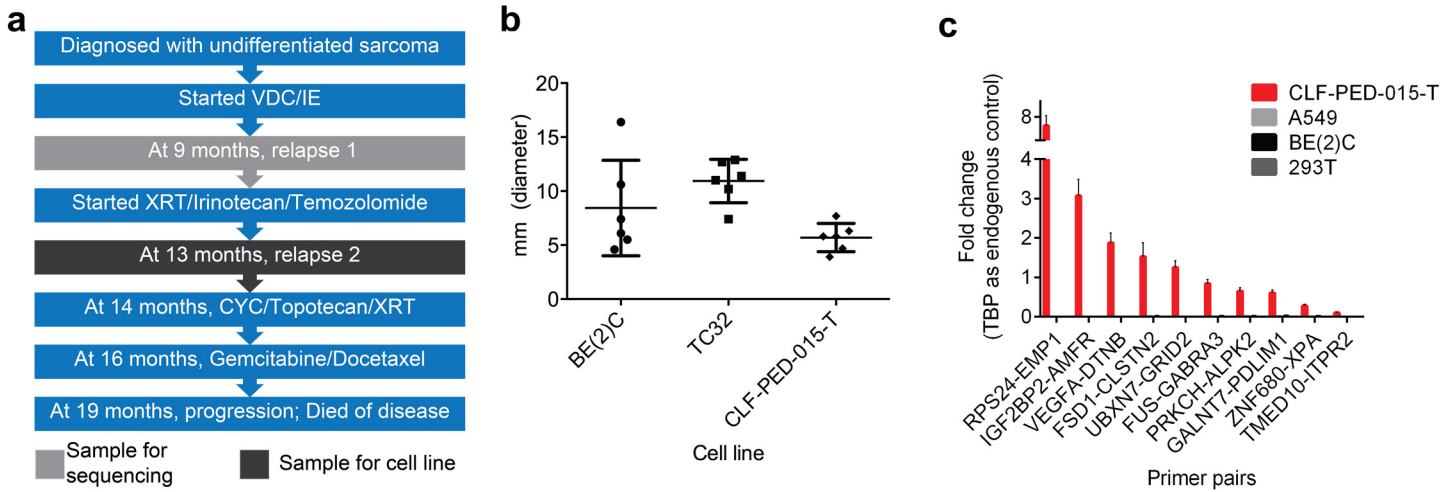

**Supplementary Figure 1: Derivation and characterization of CLF-PED-015-T cell line.** (a) Schematic of patient's clinical course. Sample for the patient's sequencing was obtained at the first relapse. The cell line was derived following the patient's second relapse. (b) Subcutaneous tumor size (by diameter) of CLF-PED-015-T in comparison to BE(2)C and TC32 (3 mice and 2 tumor sites per cell line) at 16 days. (c) Fold changes ( $2^{-\Delta\Delta C_t}$ ) of novel fusions in comparison to a control gene, *TBP*. Three biological replicates were performed in triplicates. Error bars represent mean  $\pm$ SD.

## Supplementary Figure 2

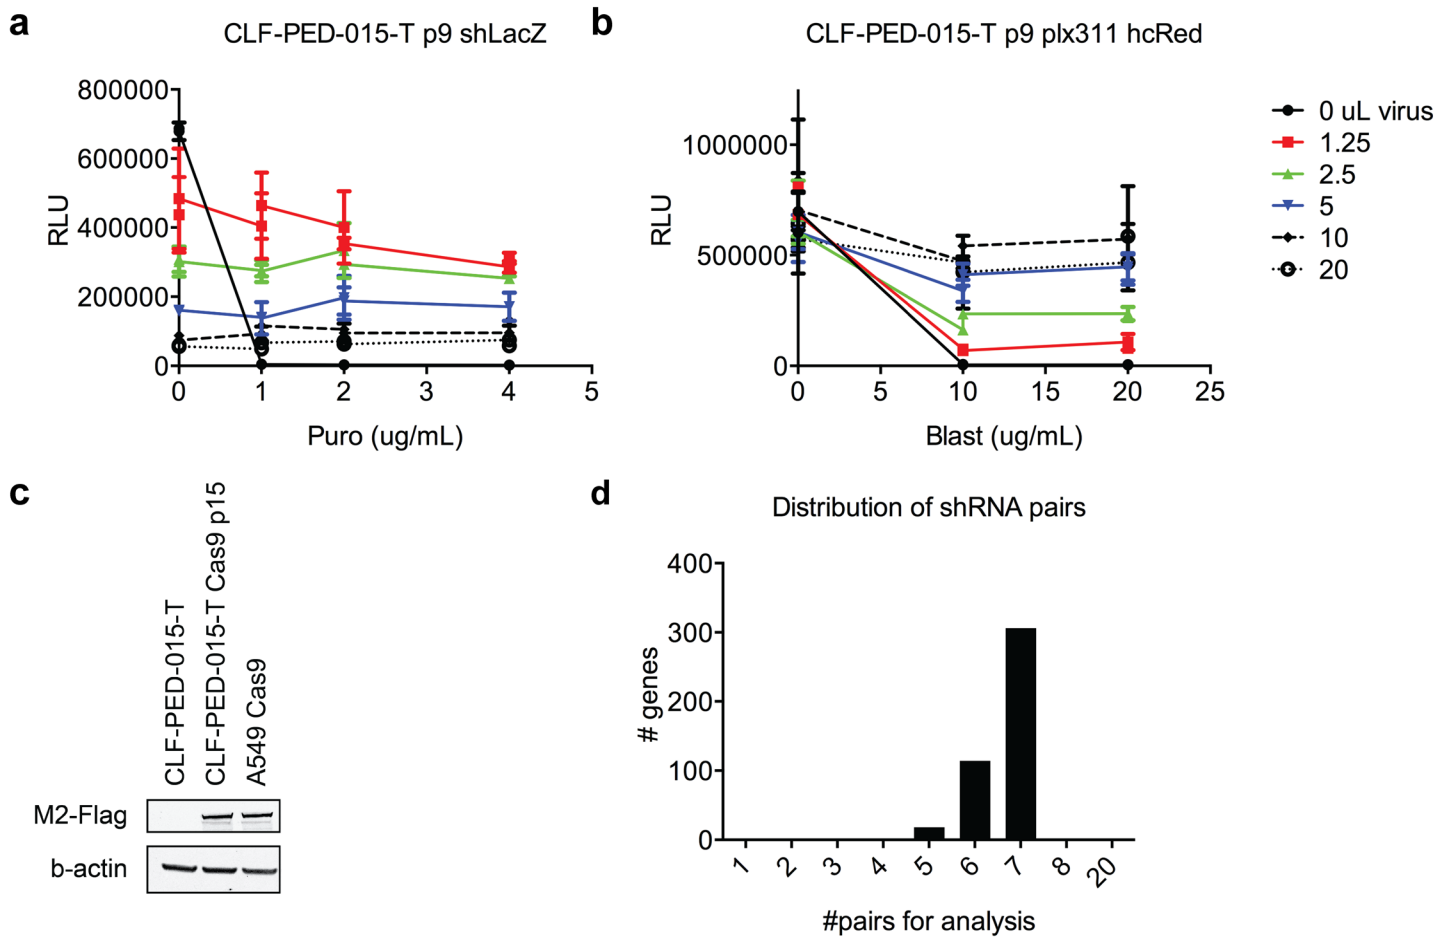

**Supplementary Figure 2: Confirmation of lentiviral delivery into CLF-PED-015-T.** (a-b) Determination of the multiplicity of infection. Titration of CLF-PED-015-T with lentiviral vectors containing a control shRNA targeting LacZ and the HcRed open reading frame (ORF). (c) Immunoblot detection of Cas9 expression with M2-Flag antibody. (d) Histogram of shRNA constructs used. Distribution of shRNA pairs used for analysis of the shRNA DCT v1.0 pool.

## Supplementary Figure 3

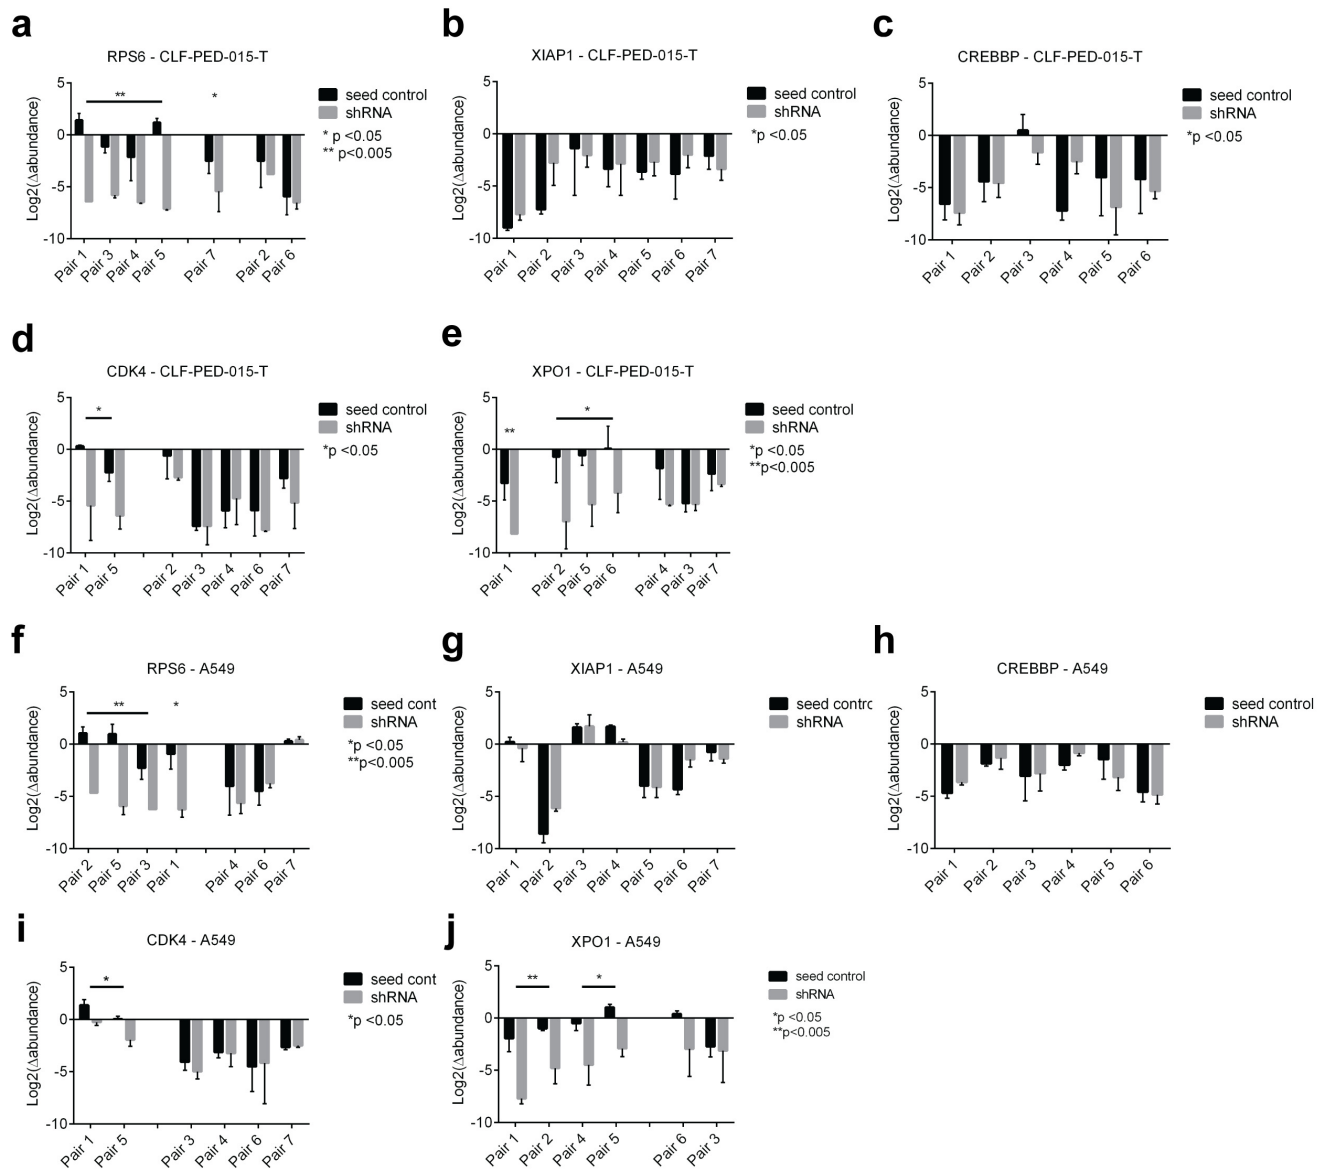

**Supplementary Figure 3: Confirmation of shRNA on-target effects using seed controls.** Analysis of shRNA DCT v1.0 pool with matched seed control based on log<sub>2</sub> barcode reads. (a) Dependency on RPS6, a known essential gene in CLF-PED-015-T. (b-c) Seed effects prevent assessment of XIAP1 and CREBBP dependency in CLF-PED-015-T. (d-e) Dependency on XPO1 and CDK4 in CLF-PED-015-T. (f) Dependency on RPS6 in A549. (g-h) Seed effects prevent assessment of XIAP1 and CREBBP dependency in A549. (i) shRNA and seed control on CDK4 in A549. (j) Dependency on XPO1 in A549.

## Supplementary Figure 4

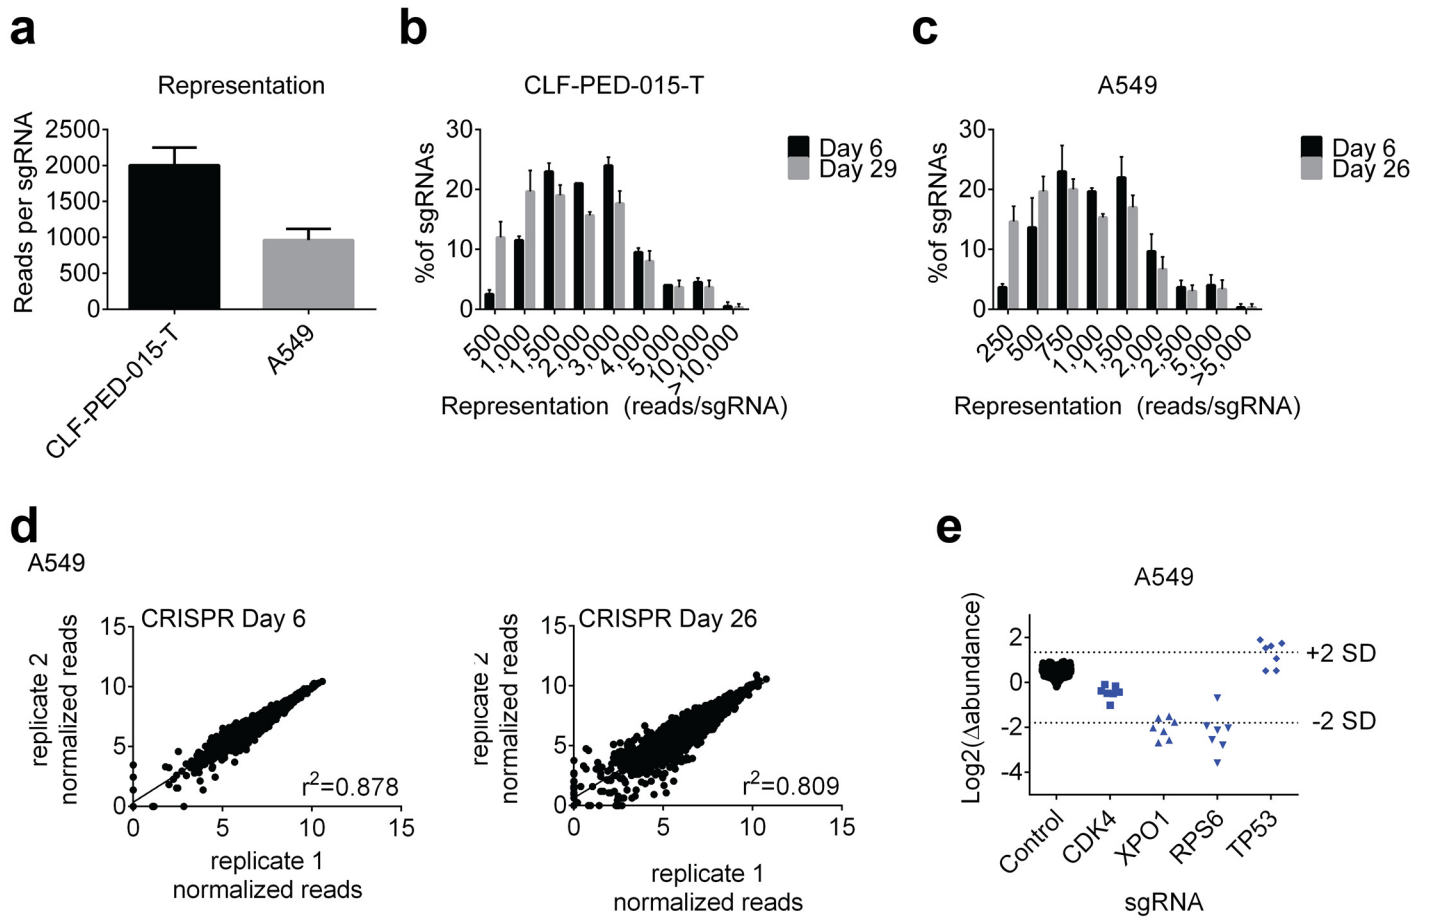

**Supplementary Figure 4: CRISPR-Cas9 screening in CLF-PED-015-T feasible and comparable with A549.** (a) Infection rate in CLF-PED-015-T based on reads per introduced sgRNA. (b-c) Representation of sgRNAs in CLF-PED-015-T at day 6 and at day 29 is comparable to A549. Error bars represent mean  $\pm$ SD. (d) Correlation coefficients of replicates for CRISPR-Cas9 screens for A549 at days 6 and 26. (e) Consequences of deleting the indicated genes in A549.

# Supplementary Figure 5

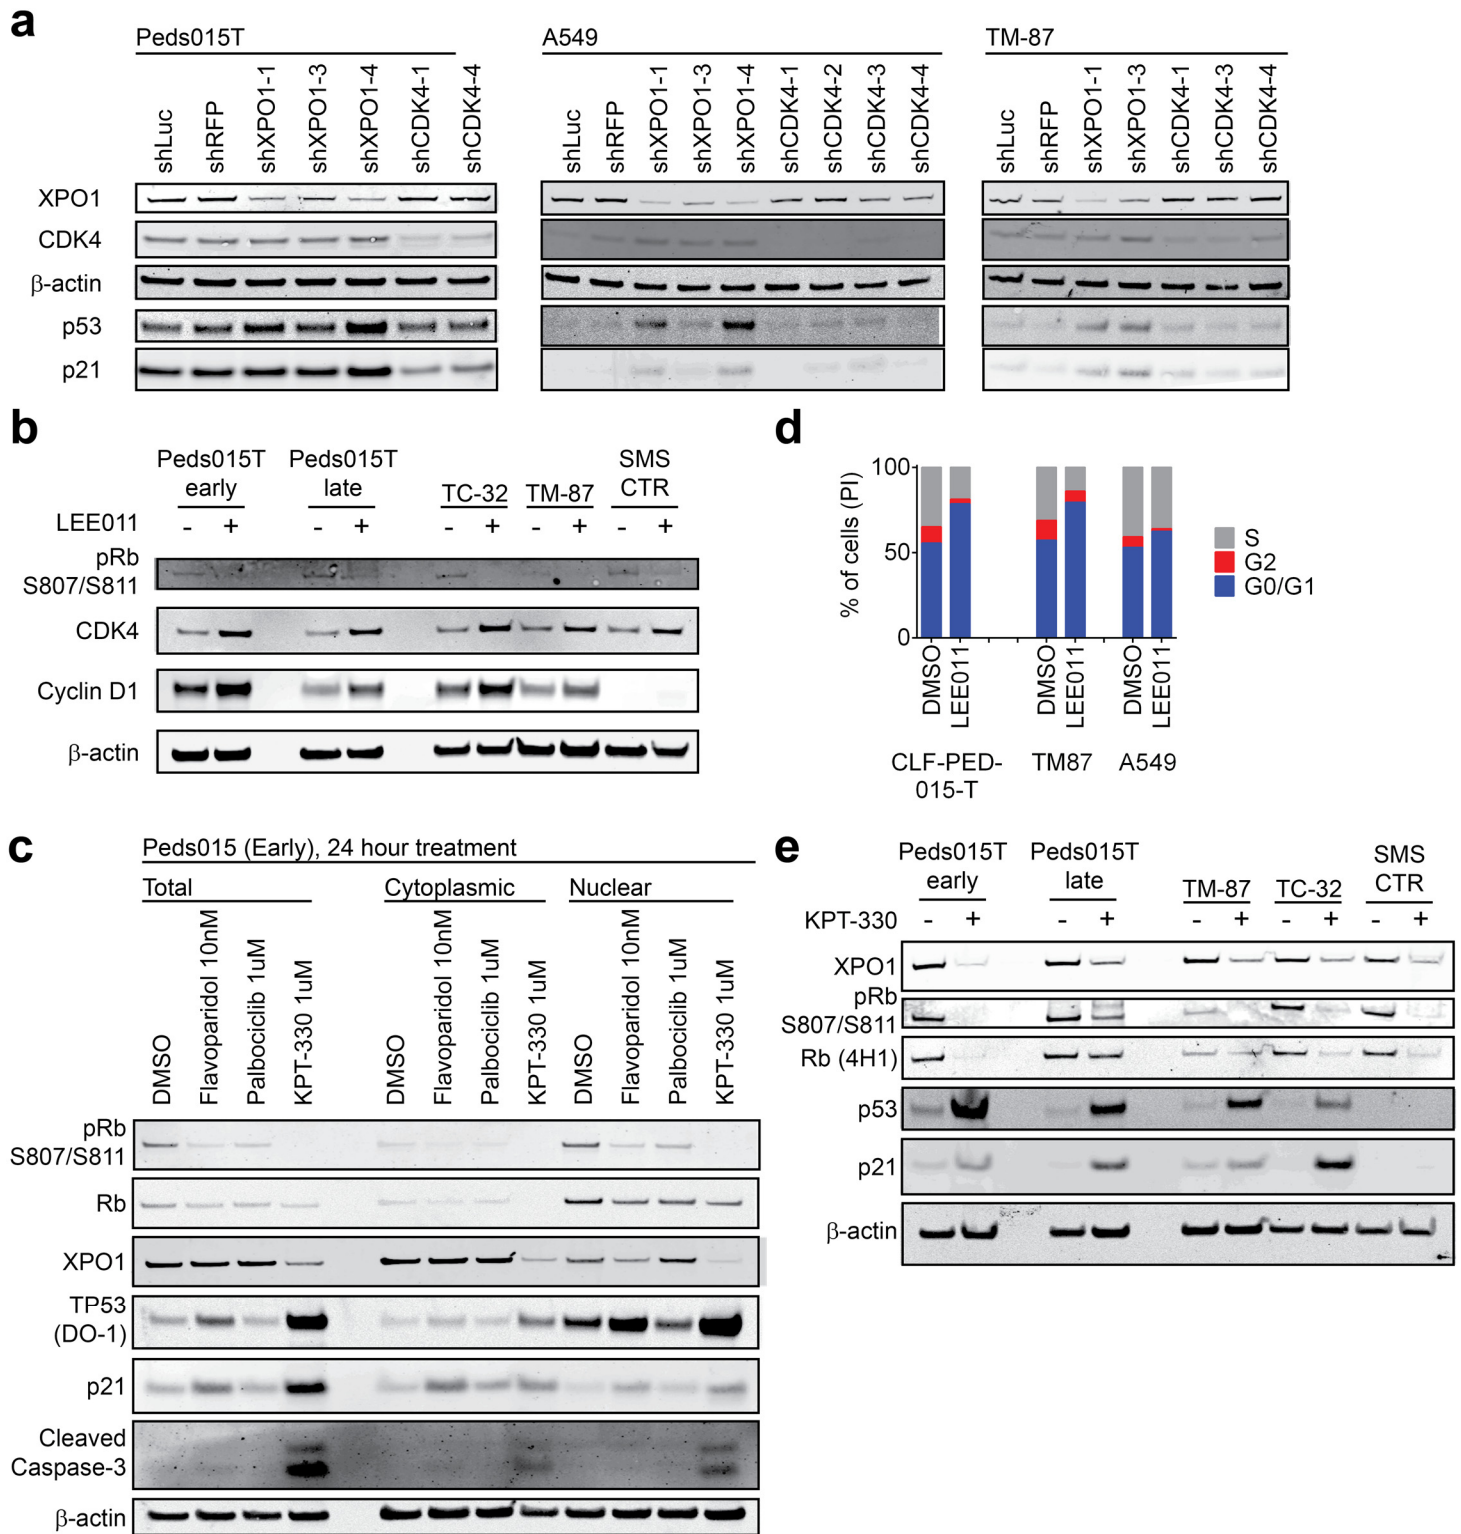

**Supplementary Figure 5: Effects of CDK4 and XPO1 inhibitors.** CDK4 inhibition leads to accumulation of cells in G0/1 and XPO1 inhibition leads to increased levels of p53 and cleaved caspase-3. a) Effects of XPO1-specific and CDK4-specific shRNAs. b) Phosphorylation of Rb (S807/S811) is inhibited and CDK4 is upregulated after treatment with the CDK4/6 inhibitor, LEE011. c) Effects of a pan-CDK inhibitor, flavopiridol, a CDK4/6 inhibitor, palbociclib and a XPO1 inhibitor, KPT-330, on Rb and p53 in nuclear and cytoplasmic fractions. KPT-330 led to increased TP53 and accumulation of cleaved caspase-3 in vitro. d) Treatment of CLF-PED-015-T with LEE011 results in a G0/G1 arrest. Data shown an average of two independent experiments. e) KPT-330 treatment results in an increase in total TP53 and inhibition of Rb.

## Supplementary Figure 6

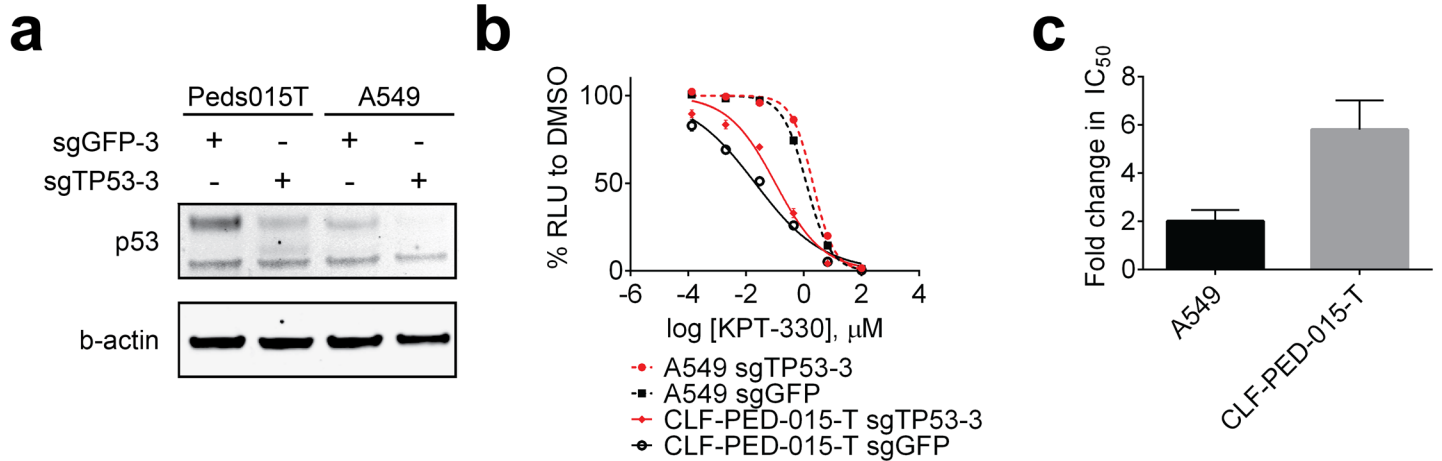

**Supplementary Figure 6: Perturbation of TP53 causes a modest shift in the  $\text{IC}_{50}$ .** We introduced sgRNAs targeting either GFP or TP53 in CLF-PED-015-T and A549 cells. (a) Decrease in p53 protein levels with sgRNAs compared to GFP controls. (b) Dose-response curves. Error bars represent mean  $\pm$ SEM. (c) Data from (b) shown as a fold change compared to GFP controls. The fold change is based on biological duplicates with technical triplicates. Error bars represent mean  $\pm$ SD.



# Supplementary Figure 7 – uncropped blots

Supplementary Figure 2c:

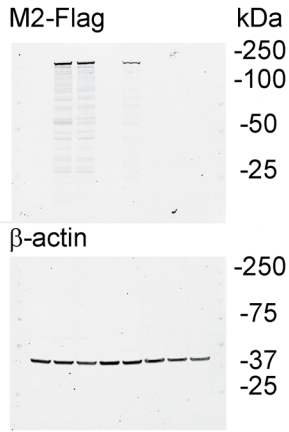

Supplementary Figure 5a:

CLF-PED-015-T

A549

TM87

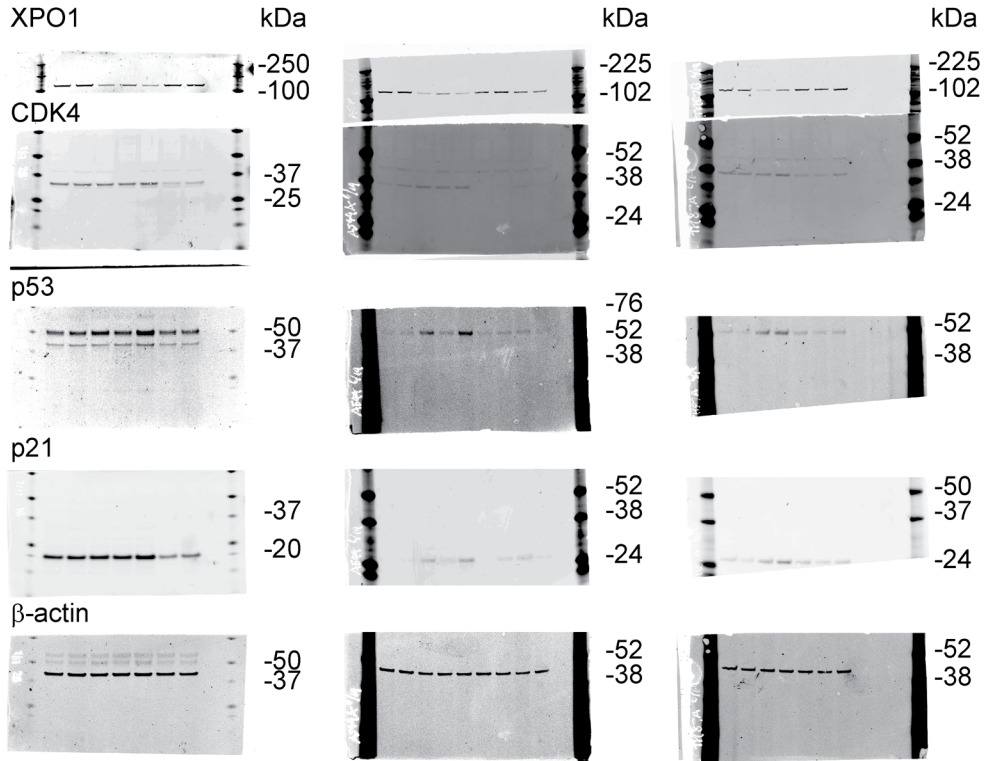

Supplementary Figure 5b:

pRb

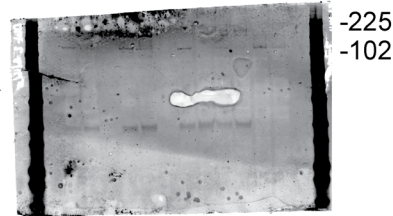

Cyclin D1

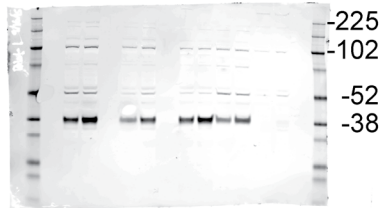

CDK4

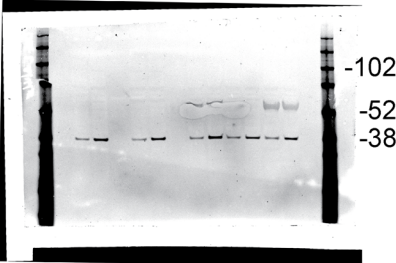

$\beta$ -actin

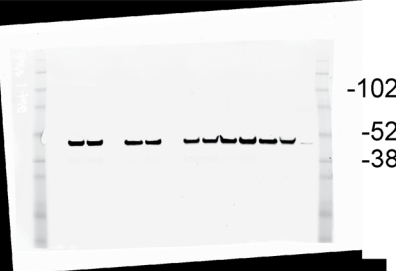

Supplementary Figure 5c:

Rb

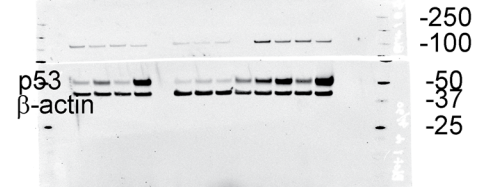

pRb

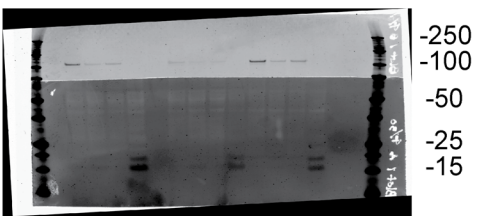

Cleaved Caspase-3

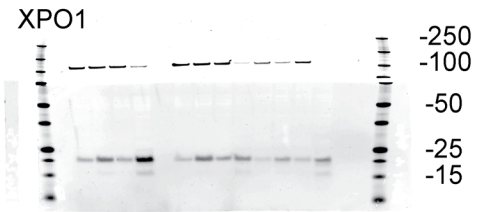

p21





# Supplementary Figure 8 – uncropped blots

Supplementary Figure 5e:

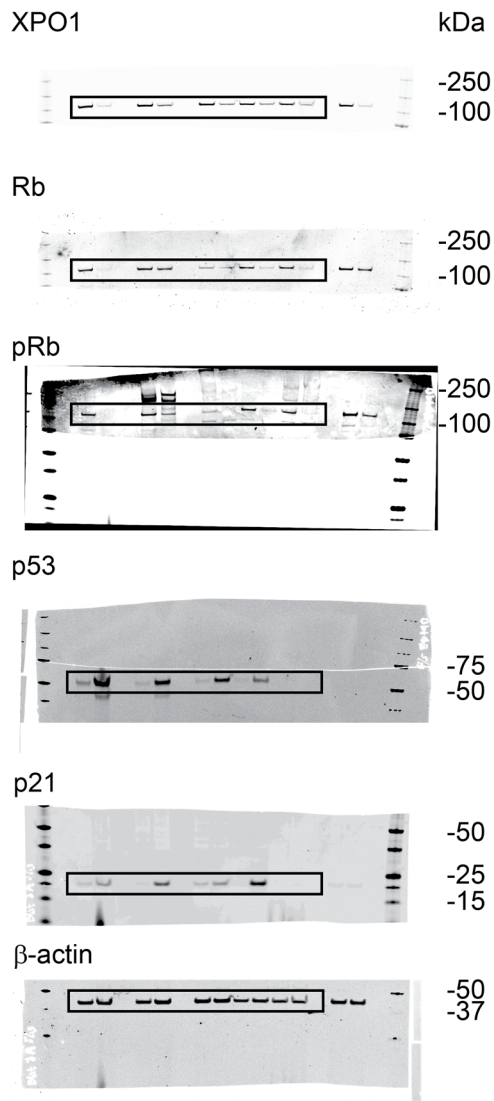

Supplementary Figure 6a:

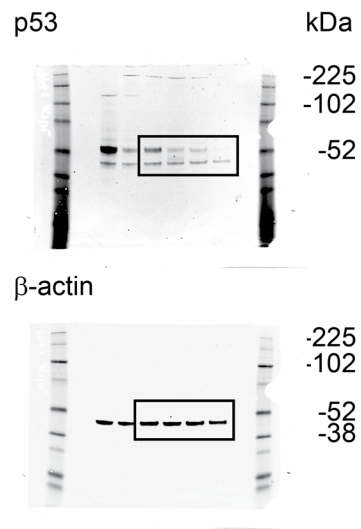

**Supplementary Table 1:** Listing of alterations seen between CLF-PED-015-T Tissue (at relapse 1) compared to cell line (at relapse 2)

| Sample                  | Gene        | Alteration                    | Variant_Classification | cDNA_Change                                                              | Allelic_fraction | Coverage |
|-------------------------|-------------|-------------------------------|------------------------|--------------------------------------------------------------------------|------------------|----------|
| Metastatic Tissue       | ASP A       | p.D104G                       | Missense_Mutation      | c.311A>G                                                                 | 24%              | 97       |
| Metastatic Tissue       | BAI3        | p.C372R                       | Missense_Mutation      | c.1114T>C                                                                | 21%              | 104      |
| Metastatic Tissue       | C17orf97    | p.DPEALKGFHP DPKALKGFHP318del | In_Frame_Del           | c.952_1011delGACCCCGAGGCCCTCAAGGGCTTCCACCCCGACCCCAAGGCCCTCAAGGGCTTCACCCC | 29%              | 92       |
| Metastatic Tissue       | FAX DC2     | p.Q61K                        | Missense_Mutation      | c.181C>A                                                                 | 17%              | 42       |
| Metastatic Tissue       | GBF1        | p.G814D                       | Missense_Mutation      | c.2441G>A                                                                | 20%              | 220      |
| Metastatic Tissue       | GGA 2       | p.C429F                       | Missense_Mutation      | c.1286G>T                                                                | 14%              | 94       |
| Metastatic Tissue       | GLTP D2     | *Deleted                      | Copy Number            |                                                                          |                  |          |
| Metastatic Tissue       | INPP 5K     | *p.N128S                      | Missense_Mutation      | c.383A>G                                                                 | 42%              | 50       |
| Metastatic Tissue       | ITGB 2      | *p.C462fs                     | Frame_Shift_Ins        | c.1383_1384insC                                                          | 20%              | 98       |
| Metastatic Tissue       | KIAA 0226   | *p.P696S                      | Missense_Mutation      | c.2086C>T                                                                | 27%              | 44       |
| Metastatic Tissue       | NIPS NAP3 B | p.A222A                       | Splice_Site            | c.666T>G                                                                 | 11%              | 38       |
| Metastatic Tissue       | PSM B6      | *Deleted                      | Copy Number            |                                                                          |                  |          |
| Metastatic Tissue       | SIRP B2     | *p.E45G                       | Missense_Mutation      | c.134A>G                                                                 | 41%              | 64       |
| Metastatic Tissue       | SOBP        | p.D58N                        | Missense_Mutation      | c.172G>A                                                                 | 26%              | 114      |
| Metastatic Tissue       | SPRR 3      | p.EPGCTKVP95del               | In_Frame_Del           | c.163_186delGAGCCAGGCTGTACCAAGGTCCC T                                    | 15%              | 71       |
| Metastatic Tissue       | TBP         | p.64_64Q>QQ                   | In_Frame_Ins           | c.189_190insCAG                                                          | 32%              | 96       |
| Metastatic Tissue       | THO C6      | p.D154G                       | Missense_Mutation      | c.461A>G                                                                 | 13%              | 40       |
| Metastatic Tissue       | TM4 SF5     | *Deleted                      | Copy Number            |                                                                          |                  |          |
| Metastatic Tissue       | VMO 1       | *Deleted                      | Copy Number            |                                                                          |                  |          |
| Metastatic Tissue       | XIRP 1      | p.L175V                       | Missense_Mutation      | c.523C>G                                                                 | 12%              | 65       |
| CLF-PED-015-T Cell Line | AFP         | p.T16A                        | Missense_Mutation      | c.46A>G                                                                  | 55%              | 51       |
| CLF-PED-015-T Cell Line | ARID 3B     | p.R379fs                      | Frame_Shift_Ins        | c.1133_1134insG                                                          | 54%              | 70       |
| CLF-PED-015-T Cell Line | ATM         | p.QRH446fs                    | Frame_Shift_Del        | c.1337_1343delAGCGACA                                                    | 20%              | 95       |

|                         |          |            |                   |                      |     |     |
|-------------------------|----------|------------|-------------------|----------------------|-----|-----|
| CLF-PED-015-T Cell Line | BEG AIN  | p.D33Y     | Missense_Mutation | c.97G>T              | 15% | 52  |
| CLF-PED-015-T Cell Line | BLID     | Amplified  | Copy Number       |                      |     |     |
| CLF-PED-015-T Cell Line | C15orf26 | p.A196S    | Missense_Mutation | c.586G>T             | 13% | 68  |
| CLF-PED-015-T Cell Line | C7       | p.C782W    | Missense_Mutation | c.2346T>G            | 15% | 66  |
| CLF-PED-015-T Cell Line | CNT NAP3 | p.G331A    | Missense_Mutation | c.992G>C             | 55% | 67  |
| CLF-PED-015-T Cell Line | COL12A1  | p.I418K    | Missense_Mutation | c.1253T>A            | 51% | 119 |
| CLF-PED-015-T Cell Line | DNA H17  | p.E773K    | Missense_Mutation | c.2317G>A            | 38% | 66  |
| CLF-PED-015-T Cell Line | FAM47C   | p.G398V    | Missense_Mutation | c.1193G>T            | 12% | 52  |
| CLF-PED-015-T Cell Line | GLTP D2  | *Deleted   | Copy Number       |                      |     |     |
| CLF-PED-015-T Cell Line | GPR110   | p.G887G    | Splice_Site       | c.2661C>A            | 10% | 40  |
| CLF-PED-015-T Cell Line | GSR      | p.SS514del | In_Frame_Del      | c.1539_1544delCTCTTC | 44% | 41  |
| CLF-PED-015-T Cell Line | HGD      | p.EE194fs  | Frame_Shift_Del   | c.582_585delGGAG     | 38% | 86  |
| CLF-PED-015-T Cell Line | IFRD1    | p.K262R    | Missense_Mutation | c.785A>G             | 45% | 51  |
| CLF-PED-015-T Cell Line | INPP5K   | *p.N128S   | Missense_Mutation | c.383A>G             | 43% | 28  |
| CLF-PED-015-T Cell Line | ITGB2    | *p.C462fs  | Frame_Shift_Ins   | c.1383_1384insC      | 19% | 48  |
| CLF-PED-015-T Cell Line | KIAA0226 | *p.P696S   | Missense_Mutation | c.2086C>T            | 41% | 22  |
| CLF-PED-015-T Cell Line | LINGO2   | p.D506H    | Missense_Mutation | c.1516G>C            | 15% | 68  |
| CLF-PED-015-T Cell Line | LTF      | p.L658R    | Missense_Mutation | c.1973T>G            | 44% | 186 |
| CLF-PED-015-T Cell Line | MIR100   | Amplified  | Copy Number       |                      |     |     |

|                         |            |           |                   |            |     |     |
|-------------------------|------------|-----------|-------------------|------------|-----|-----|
| CLF-PED-015-T Cell Line | MIRL ET7A2 | Amplified | Copy Number       |            |     |     |
| CLF-PED-015-T Cell Line | MLLT6      | p.D244Y   | Missense_Mutation | c.730G>T   | 12% | 50  |
| CLF-PED-015-T Cell Line | MYT1L      | p.P505L   | Missense_Mutation | c.1514C>T  | 53% | 78  |
| CLF-PED-015-T Cell Line | N4BP1      | p.V507G   | Missense_Mutation | c.1520T>G  | 44% | 102 |
| CLF-PED-015-T Cell Line | PCYOX1L    | p.F437S   | Missense_Mutation | c.1310T>C  | 50% | 42  |
| CLF-PED-015-T Cell Line | PDCD10     | p.L160V   | Missense_Mutation | c.478C>G   | 29% | 35  |
| CLF-PED-015-T Cell Line | PHC2       | p.N743S   | Missense_Mutation | c.2228A>G  | 39% | 38  |
| CLF-PED-015-T Cell Line | PKP2       | p.Q616E   | Missense_Mutation | c.1846C>G  | 61% | 36  |
| CLF-PED-015-T Cell Line | PNPLA4     | p.A103fs  | Frame_Shift_Del   | c.308delC  | 63% | 35  |
| CLF-PED-015-T Cell Line | POTEC      | p.T93M    | Missense_Mutation | c.278C>T   | 14% | 108 |
| CLF-PED-015-T Cell Line | PRB3       | p.R242H   | Missense_Mutation | c.725G>A   | 14% | 22  |
| CLF-PED-015-T Cell Line | PSMB6      | *Deleted  | Copy Number       |            |     |     |
| CLF-PED-015-T Cell Line | RIPK4      | p.W579C   | Missense_Mutation | c.1737G>T  | 10% | 39  |
| CLF-PED-015-T Cell Line | RNF17      | p.P1298T  | Missense_Mutation | c.3892C>A  | 44% | 147 |
| CLF-PED-015-T Cell Line | SCN7A      | p.F1476fs | Frame_Shift_Del   | c.4428delT | 40% | 35  |
| CLF-PED-015-T Cell Line | SIK1       | p.Q271H   | Missense_Mutation | c.813G>T   | 24% | 25  |
| CLF-PED-015-T Cell Line | SIRPB2     | *p.E45G   | Missense_Mutation | c.134A>G   | 52% | 23  |
| CLF-PED-015-T Cell Line | SLC12A1    | p.D758G   | Missense_Mutation | c.2273A>G  | 35% | 72  |
| CLF-PED-015-T Cell Line | SNRNP35    | p.E178G   | Missense_Mutation | c.533A>G   | 36% | 39  |

|                         |         |           |                   |            |     |    |
|-------------------------|---------|-----------|-------------------|------------|-----|----|
| CLF-PED-015-T Cell Line | TM4 SF5 | *Deleted  | Copy Number       |            |     |    |
| CLF-PED-015-T Cell Line | TTN     | p.V16346M | Missense_Mutation | c.49036G>A | 14% | 22 |
| CLF-PED-015-T Cell Line | VMO 1   | *Deleted  | Copy Number       |            |     |    |
| CLF-PED-015-T Cell Line | ZNF2 35 | p.H453Q   | Missense_Mutation | c.1359C>A  | 55% | 62 |

\* Overlaps

**Supplementary Table 2: Fusions common across Chimerascan, STAR and PRADA**

| chrom5 p | chrom3 p | type             | fusion_name    | start5p.T P1 | end5p.T P1 | start3p.T P1 | end3p.T P1 | sample.TP1          |
|----------|----------|------------------|----------------|--------------|------------|--------------|------------|---------------------|
| chr10    | chr12    | Interchromosomal | RPS24--EMP1    | 79793517     | 79795477   | 13366412     | 13369706   | Metastatic specimen |
| chr14    | chr12    | Interchromosomal | TMED10--ITPR2  | 75643057     | 75643348   | 26488286     | 26564344   | Metastatic specimen |
| chr14    | chr18    | Interchromosomal | PRKCH--ALPK2   | 61788514     | 61920070   | 56148483     | 56184413   | Metastatic specimen |
| chr16    | chrX     | Interchromosomal | FUS--GABRA3    | 31191452     | 31196499   | 151335633    | 151514173  | Metastatic specimen |
| chr3     | chr16    | Interchromosomal | IGF2BP2--AMFR  | 185542570    | 185542826  | 56395364     | 56448255   | Metastatic specimen |
| chr3     | chr4     | Interchromosomal | UBXN7--GRID2   | 196089164    | 196159344  | 94006145     | 94138416   | Metastatic specimen |
| chr4     | chr10    | Interchromosomal | GALNT7--PDLIM1 | 174089903    | 174090111  | 96997331     | 97007122   | Metastatic specimen |
| chr6     | chr2     | Interchromosomal | VEGFA--DTNB    | 43737952     | 43746654   | 25606205     | 25611229   | Metastatic specimen |
| chr7     | chr9     | Interchromosomal | ZNF680--XPA    | 64023302     | 64023504   | 100437191    | 100437868  | Metastatic specimen |
|          |          |                  |                |              |            |              |            |                     |
| chrom5 p | chrom3 p | type             | fusion_name    | start5p      | end5p      | start3p      | end3p      | sample              |
| chr10    | chr12    | Interchromosomal | RPS24--EMP1    | 79793517     | 79795477   | 13366412     | 13369706   | CLF-PED-015-T       |
| chr16    | chrX     | Interchromosomal | FUS--GABRA3    | 31191452     | 31196499   | 151335633    | 151514173  | CLF-PED-015-T       |
| chr3     | chr4     | Interchromosomal | UBXN7--GRID2   | 196088714    | 196159344  | 94006145     | 94138416   | CLF-PED-015-T       |
| chr4     | chr10    | Interchromosomal | GALNT7--PDLIM1 | 174089903    | 174090111  | 96997331     | 97007122   | CLF-PED-015-T       |
| chr6     | chr2     | Interchromosomal | VEGFA--DTNB    | 43737952     | 43749823   | 25606205     | 25611229   | CLF-PED-015-T       |
| chr19    | chr3     | Interchromosomal | FSD1--CLSTN2   | 4304590      | 4312047    | 140122470    | 140275896  | CLF-PED-015-T       |
| chr7     | chr9     | Interchromosomal | ZNF680--XPA    | 64004084     | 64023504   | 100437191    | 100437868  | CLF-PED-015-T       |
| chr3     | chr16    | Interchromosomal | IGF2BP2--AMFR  | 185540940    | 185542826  | 56395364     | 56443499   | CLF-PED-015-T       |

**Supplementary Table 3: Druggable targets (both shRNA and CRISPR)**

| <b>Symbol</b> | <b>HGNC ID</b> | <b>Location</b> |
|---------------|----------------|-----------------|
| ABCG2         | HGNC:74        | 4q22.1          |
| ABL1          | HGNC:76        | 9q34.1          |
| ABL2          | HGNC:77        | 1q25.2          |
| ACAT1         | HGNC:93        | 11q22.3         |
| ACER1         | HGNC:18356     | 19p13.3         |
| ACER2         | HGNC:23675     | 9p21.3          |
| ACER3         | HGNC:16066     | 11q13.5         |
| ACTB          | HGNC:132       | 7p22            |
| ADORA2A       | HGNC:263       | 22q11.23        |
| AGXT          | HGNC:341       | 2q37.3          |
| AHR           | HGNC:348       | 7p15            |
| AKT1          | HGNC:391       | 14q32.33        |
| AKT2          | HGNC:392       | 19q13.1-q13.2   |
| AKT3          | HGNC:393       | 1q44            |
| ALK           | HGNC:427       | 2p23            |
| ANPEP         | HGNC:500       | 15q25-q26       |
| APC           | HGNC:583       | 5q21-q22        |
| APH1A         | HGNC:29509     | 1q21.2          |
| AR            | HGNC:644       | Xq12            |
| ARAF          | HGNC:646       | Xp11.3-p11.23   |
| ARF1          | HGNC:652       | 1q42.13         |
| ARFGAP1       | HGNC:15852     | 20q13.33        |
| ARFGAP3       | HGNC:661       | 22q13.2         |
| ARG1          | HGNC:663       | 6q23            |
| ARG2          | HGNC:664       | 14q24.1         |
| ASAH1         | HGNC:735       | 8p22            |
| ASAH2         | HGNC:18860     | 10q11.23        |
| ATM           | HGNC:795       | 11q22-q23       |
| ATP1A1        | HGNC:799       | 1p13            |
| ATP1A2        | HGNC:800       | 1q23.2          |
| ATP1A3        | HGNC:801       | 19q13.2         |
| ATP1A4        | HGNC:14073     | 1q23.2          |
| ATP1B1        | HGNC:804       | 1q24.2          |
| ATP1B3        | HGNC:806       | 3q23            |
| ATP1B4        | HGNC:808       | Xq24            |
| ATP5L2        | HGNC:13213     | 22q13.2         |
| ATP6V0A1      | HGNC:865       | 17q21           |
| ATR           | HGNC:882       | 3q23            |
| AURKA         | HGNC:11393     | 20q13           |
| AURKB         | HGNC:11390     | 17p13.1         |
| AURKC         | HGNC:11391     | 19q13.43        |
| AXIN1         | HGNC:903       | 16p13.3         |
| AXL           | HGNC:905       | 19q13.1         |
| BAX           | HGNC:959       | 19q13.3-q13.4   |
| BCL2          | HGNC:990       | 18q21.3         |
| BCL2L1        | HGNC:992       | 20q11.21        |
| BCL2L10       | HGNC:993       | 15q21           |
| BCL2L2        | HGNC:995       | 14q11.2-q12     |



|         |            |               |
|---------|------------|---------------|
| BCR     | HGNC:1014  | 22q11         |
| BIRC2   | HGNC:590   | 11q22         |
| BIRC3   | HGNC:591   | 11q22         |
| BIRC5   | HGNC:593   | 17q25.3       |
| BRAF    | HGNC:1097  | 7q34          |
| BRD2    | HGNC:1103  | 6p21.3        |
| BRD3    | HGNC:1104  | 9q34          |
| BRD4    | HGNC:13575 | 19p13.12      |
| BRDT    | HGNC:1105  | 1p22.1        |
| BTK     | HGNC:1133  | Xq21.33-q22   |
| CA1     | HGNC:1368  | 8q21.2        |
| CA12    | HGNC:1371  | 15q22         |
| CA13    | HGNC:14914 | 8q21.2        |
| CA14    | HGNC:1372  | 1q21          |
| CA2     | HGNC:1373  | 8q21.2        |
| CA3     | HGNC:1374  | 8q21.2        |
| CA4     | HGNC:1375  | 17q23.1       |
| CA6     | HGNC:1380  | 1p36.2        |
| CA7     | HGNC:1381  | 16q22.1       |
| CA9     | HGNC:1383  | 9p13.3        |
| CASP3   | HGNC:1504  | 4q34          |
| CASP6   | HGNC:1507  | 4q25          |
| CASP7   | HGNC:1508  | 10q25         |
| CCR4    | HGNC:1605  | 3p24-p21.3    |
| CD19    | HGNC:1633  | 16p11.2       |
| CD22    | HGNC:1643  | 19q13.1       |
| CD248   | HGNC:18219 | 11q13         |
| CD33    | HGNC:1659  | 19q13.3       |
| CD37    | HGNC:1666  | 19q13.33      |
| CD38    | HGNC:1667  | 4p15.32       |
| CD52    | HGNC:1804  | 1p36          |
| CD79B   | HGNC:1699  | 17q23         |
| CDA     | HGNC:1712  | 1p36.2-p35    |
| CDC25A  | HGNC:1725  | 3p21          |
| CDC25B  | HGNC:1726  | 20p13         |
| CDC25C  | HGNC:1727  | 5q31          |
| CDK1    | HGNC:1722  | 10q21.2       |
| CDK2    | HGNC:1771  | 12q13         |
| CDK4    | HGNC:1773  | 12q13         |
| CDK5    | HGNC:1774  | 7q36          |
| CDK6    | HGNC:1777  | 7q21-q22      |
| CDK7    | HGNC:1778  | 5q12.1        |
| CDK9    | HGNC:1780  | 9q34.1        |
| CEACAM5 | HGNC:1817  | 19q13.1-q13.2 |
| CERK    | HGNC:19256 | 22q13.31      |
| CERS1   | HGNC:14253 | 19p12         |
| CERS2   | HGNC:14076 | 1q21.3        |
| CERS3   | HGNC:23752 | 15q26.3       |
| CERS4   | HGNC:23747 | 19p13.2       |
| CERS5   | HGNC:23749 | 12q13.12      |

|         |            |             |
|---------|------------|-------------|
| CERS6   | HGNC:23826 | 2q31        |
| CHEK1   | HGNC:1925  | 11q24.2     |
| CHEK2   | HGNC:16627 | 22q12.1     |
| CLK1    | HGNC:2068  | 2q33        |
| CLK4    | HGNC:13659 | 5q35        |
| CLTA    | HGNC:2090  | 9p13.3      |
| CLTB    | HGNC:2091  | 5q35.2      |
| CLTC    | HGNC:2092  | 17q23.1     |
| CLTCL1  | HGNC:2093  | 22q11.2     |
| CMPK1   | HGNC:18170 | 1p34.1-p33  |
| CPT1A   | HGNC:2328  | 11q13.2     |
| CRBN    | HGNC:30185 | 3p26.3      |
| CREB1   | HGNC:2345  | 2q34        |
| CREBBP  | HGNC:2348  | 16p13.3     |
| CSF1R   | HGNC:2433  | 5q32        |
| CSNK1A1 | HGNC:2451  | 5q32        |
| CSNK1D  | HGNC:2452  | 17q25       |
| CSNK1E  | HGNC:2453  | 22q13.1     |
| CSNK2A1 | HGNC:2457  | 20p13       |
| CSNK2A2 | HGNC:2459  | 16q21       |
| CTLA4   | HGNC:2505  | 2q33        |
| CTNNB1  | HGNC:2514  | 3p21        |
| CUL1    | HGNC:2551  | 7q36.1      |
| CUL4A   | HGNC:2554  | 13q34       |
| CUL4B   | HGNC:2555  | Xq23        |
| CXCR2   | HGNC:6027  | 2q35        |
| CXCR4   | HGNC:2561  | 2q21        |
| CYP17A1 | HGNC:2593  | 10q24.3     |
| CYP19A1 | HGNC:2594  | 15q21       |
| DDB1    | HGNC:2717  | 11q12.2     |
| DHFR    | HGNC:2861  | 5q14.1      |
| DIABLO  | HGNC:21528 | 12q24.31    |
| DLL4    | HGNC:2910  | 15q14       |
| DNM1    | HGNC:2972  | 9q34        |
| DNMT1   | HGNC:2976  | 19p13.2     |
| DOT1L   | HGNC:24948 | 19p13.3     |
| DPP4    | HGNC:3009  | 2q24.2      |
| DRD2    | HGNC:3023  | 11q23.2     |
| EDNRB   | HGNC:3180  | 13q22       |
| EGFR    | HGNC:3236  | 7p12        |
| EHMT1   | HGNC:24650 | 9q34.3      |
| EHMT2   | HGNC:14129 | 6p21.3      |
| ENPP3   | HGNC:3358  | 6q22        |
| EP300   | HGNC:3373  | 22q13.2     |
| EPCAM   | HGNC:11529 | 2p21        |
| EPHA2   | HGNC:3386  | 1p36        |
| ERBB2   | HGNC:3430  | 17q11.2-q12 |
| ERBB3   | HGNC:3431  | 12q13       |
| ERBB4   | HGNC:3432  | 2q33.3-q34  |
| ERG     | HGNC:3446  | 21q22.3     |

|          |            |                |
|----------|------------|----------------|
| ESR1     | HGNC:3467  | 6q24-q27       |
| ESR2     | HGNC:3468  | 14q21-q22      |
| ETV1     | HGNC:3490  | 7p22           |
| EWSR1    | HGNC:3508  | 22q12.2        |
| EZH2     | HGNC:3527  | 7q35-q36       |
| F2R      | HGNC:3537  | 5q13           |
| FAAH     | HGNC:3553  | 1p35-p34       |
| FASN     | HGNC:3594  | 17q25          |
| FGFR1    | HGNC:3688  | 8p11.23-p11.22 |
| FGFR2    | HGNC:3689  | 10q25.3-q26    |
| FGFR3    | HGNC:3690  | 4p16.3         |
| FGFR4    | HGNC:3691  | 5q35.2         |
| FLI1     | HGNC:3749  | 11q24.1-q24.3  |
| FLT1     | HGNC:3763  | 13q12          |
| FLT3     | HGNC:3765  | 13q12          |
| FLT4     | HGNC:3767  | 5q34-q35       |
| FNTA     | HGNC:3782  | 8p11.21        |
| FNTB     | HGNC:3785  | 14q23.3        |
| FOLH1    | HGNC:3788  | 11p11.2        |
| FYN      | HGNC:4037  | 6q21           |
| FZD7     | HGNC:4045  | 2q33           |
| GLI1     | HGNC:4317  | 12q13.3        |
| GLS      | HGNC:4331  | 2q32-q34       |
| GM2A     | HGNC:4367  | 5q33.1         |
| GNRH1    | HGNC:4419  | 8p21-p11.2     |
| GSK3A    | HGNC:4616  | 19q13          |
| GSK3B    | HGNC:4617  | 3q13.3         |
| GUCY2C   | HGNC:4688  | 12p12          |
| HDAC1    | HGNC:4852  | 1p34           |
| HDAC10   | HGNC:18128 | 22q13.31       |
| HDAC11   | HGNC:19086 | 3p25.1         |
| HDAC2    | HGNC:4853  | 6q21           |
| HDAC3    | HGNC:4854  | 5q31.1-q31.2   |
| HDAC4    | HGNC:14063 | 2q37.3         |
| HDAC5    | HGNC:14068 | 17q21          |
| HDAC6    | HGNC:14064 | Xp11.23        |
| HDAC7    | HGNC:14067 | 12q13.1        |
| HDAC8    | HGNC:13315 | Xq13           |
| HDAC9    | HGNC:14065 | 7p21.1         |
| HGF      | HGNC:4893  | 7q21.1         |
| HMGCR    | HGNC:5006  | 5q13.3-q14     |
| HMGCS1   | HGNC:5007  | 5p12           |
| HNF4A    | HGNC:5024  | 20q13.12       |
| HRH2     | HGNC:5183  | 5q35           |
| HSP90AA1 | HGNC:5253  | 14q32.33       |
| HSP90AA2 | HGNC:5256  | 11p14.1        |
| HSP90AB1 | HGNC:5258  | 6p12           |
| HSP90B1  | HGNC:12028 | 12q24.2-q24.3  |
| HSPA1A   | HGNC:5232  | 6p21.3         |
| HSPA1B   | HGNC:5233  | 6p21.3         |

|         |            |                |
|---------|------------|----------------|
| HSPA1L  | HGNC:5234  | 6p21.3         |
| IDH1    | HGNC:5382  | 2q34           |
| IFNA2   | HGNC:5423  | 9p22           |
| IGF1    | HGNC:5464  | 12q23.2        |
| IGF1R   | HGNC:5465  | 15q26.3        |
| IGF2    | HGNC:5466  | 11p15.5        |
| IKBKB   | HGNC:5960  | 8p11.2         |
| IKBKE   | HGNC:14552 | 1q32.1         |
| IL12RB1 | HGNC:5971  | 19p13.1        |
| IL21    | HGNC:6005  | 4q26-q27       |
| IL6     | HGNC:6018  | 7p15.3         |
| INSR    | HGNC:6091  | 19p13.3-p13.2  |
| ITGA2   | HGNC:6137  | 5q11.2         |
| JAK1    | HGNC:6190  | 1p32.3-p31.3   |
| JAK2    | HGNC:6192  | 9p24           |
| JAK3    | HGNC:6193  | 19p13-p12      |
| JMJD6   | HGNC:19355 | 17q25          |
| KDM1A   | HGNC:29079 | 1p36.12        |
| KDM3A   | HGNC:20815 | 2p11.2         |
| KDM4A   | HGNC:22978 | 1p34.1         |
| KDM4B   | HGNC:29136 | 19p13.3        |
| KDM4C   | HGNC:17071 | 9p24-p23       |
| KDM4D   | HGNC:25498 | 11q21          |
| KDM6A   | HGNC:12637 | Xp11.2         |
| KDM6B   | HGNC:29012 | 17p13.1        |
| KDR     | HGNC:6307  | 4q11-q12       |
| KIF11   | HGNC:6388  | 10q24.1        |
| KIT     | HGNC:6342  | 4q12           |
| KLF5    | HGNC:6349  | 13q21.3        |
| KPNB1   | HGNC:6400  | 17q21.32       |
| KRAS    | HGNC:6407  | 12p12.1        |
| LAP3    | HGNC:18449 | 4p15.33        |
| LCK     | HGNC:6524  | 1p34.3         |
| LRRK2   | HGNC:18618 | 12q12          |
| LYPLA1  | HGNC:6737  | 8q11.23        |
| MAGEA3  | HGNC:6801  | Xq28           |
| MAP2K1  | HGNC:6840  | 15q22.1-q22.33 |
| MAP2K2  | HGNC:6842  | 19p13.3        |
| MAP3K8  | HGNC:6860  | 10p11.2        |
| MAPK10  | HGNC:6872  | 4q22-q23       |
| MAPK14  | HGNC:6876  | 6p21.3-p21.2   |
| MAPK3   | HGNC:6877  | 16p11.2        |
| MAPK8   | HGNC:6881  | 10q11          |
| MAPK9   | HGNC:6886  | 5q35           |
| MAPKAP1 | HGNC:18752 | 9q34.11        |
| MCL1    | HGNC:6943  | 1q21           |
| MDM2    | HGNC:6973  | 12q13-q14      |
| MEN1    | HGNC:7010  | 11q13          |
| MET     | HGNC:7029  | 7q31           |
| MGMT    | HGNC:7059  | 10q26          |

|         |            |               |
|---------|------------|---------------|
| MLST8   | HGNC:24825 | 16p13.3       |
| MMP1    | HGNC:7155  | 11q22.2       |
| MS4A1   | HGNC:7315  | 11q12.2       |
| MSLN    | HGNC:7371  | 16p13.3       |
| MTOR    | HGNC:3942  | 1p36          |
| MUC16   | HGNC:15582 | 19p13.2       |
| MYC     | HGNC:7553  | 8q24          |
| MYH1    | HGNC:7567  | 17p13.1       |
| MYH2    | HGNC:7572  | 17p13.1       |
| NAE1    | HGNC:621   | 16q22         |
| NAMPT   | HGNC:30092 | 7q22.3        |
| NCEH1   | HGNC:29260 | 3q26.31       |
| NCSTN   | HGNC:17091 | 1q22-q23      |
| NEDD8   | HGNC:7732  | 14q11.2       |
| NEUROD1 | HGNC:7762  | 2q32          |
| NEUROD2 | HGNC:7763  | 17q12         |
| NFKB1   | HGNC:7794  | 4q24          |
| NOTCH1  | HGNC:7881  | 9q34.3        |
| NOTCH2  | HGNC:7882  | 1p13-p11      |
| NOTCH3  | HGNC:7883  | 19p13.12      |
| NOTCH4  | HGNC:7884  | 6p21.3        |
| NPEPPS  | HGNC:7900  | 17q12-q21     |
| NR1D1   | HGNC:7962  | 17q11.2       |
| NR1H4   | HGNC:7967  | 12q23.1       |
| NR3C1   | HGNC:7978  | 5q31-q32      |
| P2RX7   | HGNC:8537  | 12q24         |
| PAK4    | HGNC:16059 | 19q13.2       |
| PARP1   | HGNC:270   | 1q41-q42      |
| PARP2   | HGNC:272   | 14q11.2       |
| PDE4A   | HGNC:8780  | 19p13.2       |
| PDE4B   | HGNC:8781  | 1p31          |
| PDE4D   | HGNC:8783  | 5q12          |
| PDE5A   | HGNC:8784  | 4q27          |
| PDGFRA  | HGNC:8803  | 4q12          |
| PDGFRB  | HGNC:8804  | 5q33.1        |
| PDK2    | HGNC:8810  | 17q21.33      |
| PI4KB   | HGNC:8984  | 1q21          |
| PICK1   | HGNC:9394  | 22q13.1       |
| PIK3CA  | HGNC:8975  | 3q26.3        |
| PIK3CB  | HGNC:8976  | 3q22.3        |
| PIK3CD  | HGNC:8977  | 1p36.2        |
| PIK3CG  | HGNC:8978  | 7q22          |
| PIM1    | HGNC:8986  | 6p21          |
| PLA2G4A | HGNC:9035  | 1q31.1        |
| PLA2G4B | HGNC:9036  | 15q11.2-q21.3 |
| PLA2G4C | HGNC:9037  | 19q13.3       |
| PLA2G4D | HGNC:30038 | 15q14         |
| PLAUR   | HGNC:9053  | 19q13         |
| PLD1    | HGNC:9067  | 3q26          |
| PLD2    | HGNC:9068  | 17p13.3       |

|         |            |              |
|---------|------------|--------------|
| PLK1    | HGNC:9077  | 16p          |
| PLK3    | HGNC:2154  | 1p34.1       |
| POLA1   | HGNC:9173  | Xp22.1-p21.3 |
| POLA2   | HGNC:30073 | 11q13        |
| POLE    | HGNC:9177  | 12q24.3      |
| PORCN   | HGNC:17652 | Xp11.23      |
| PPID    | HGNC:9257  | 4q31.3       |
| PPP2CA  | HGNC:9299  | 5q31.1       |
| PPP3CA  | HGNC:9314  | 4q24         |
| PPP3CB  | HGNC:9315  | 10q22.2      |
| PPP3CC  | HGNC:9316  | 8p21.3       |
| PPP3R1  | HGNC:9317  | 2p14         |
| PPP3R2  | HGNC:9318  | 9q31         |
| PRKCB   | HGNC:9395  | 16p12        |
| PRKCI   | HGNC:9404  | 3q26.3       |
| PRKCSH  | HGNC:9411  | 19p13.2      |
| PRKDC   | HGNC:9413  | 8q11         |
| PRLR    | HGNC:9446  | 5p14-p13     |
| PSEN1   | HGNC:9508  | 14q24.3      |
| PSENE1  | HGNC:30100 | 19q13.12     |
| PSMB1   | HGNC:9537  | 6q27         |
| PSMB2   | HGNC:9539  | 1p34.2       |
| PSMB5   | HGNC:9542  | 14q11.2      |
| PSMD1   | HGNC:9554  | 2q37.1       |
| PSMD2   | HGNC:9559  | 3q27.3       |
| PTGER3  | HGNC:9595  | 1p31.2       |
| PTGER4  | HGNC:9596  | 5p13.1       |
| PTGS2   | HGNC:9605  | 1q25.2-q25.3 |
| PTK2    | HGNC:9611  | 8q24.3       |
| PTP4A3  | HGNC:9636  | 8q24.3       |
| PVRL4   | HGNC:19688 | 1q23.3       |
| RAC1    | HGNC:9801  | 7p22         |
| RAD51   | HGNC:9817  | 15q15.1      |
| RAF1    | HGNC:9829  | 3p25         |
| RAN     | HGNC:9846  | 12q24.33     |
| RARA    | HGNC:9864  | 17q21.1      |
| RARB    | HGNC:9865  | 3p24         |
| RARG    | HGNC:9866  | 12q13        |
| RASA1   | HGNC:9871  | 5q13         |
| RET     | HGNC:9967  | 10q11.2      |
| RHOA    | HGNC:667   | 3p21.3       |
| RICTOR  | HGNC:28611 | 5p13.1       |
| RIPK1   | HGNC:10019 | 6p25.2       |
| RORA    | HGNC:10258 | 15q21-q22    |
| RORC    | HGNC:10260 | 1q21         |
| ROS1    | HGNC:10261 | 6q21-q22     |
| RPS6KB1 | HGNC:10436 | 17q23.1      |
| RPS6KB2 | HGNC:10437 | 11q13.1      |
| RPTOR   | HGNC:30287 | 17q25.3      |
| RRM1    | HGNC:10451 | 11p15.5      |

|          |            |              |
|----------|------------|--------------|
| RXRA     | HGNC:10477 | 9q34         |
| RXRB     | HGNC:10478 | 6p21.3       |
| RXRG     | HGNC:10479 | 1q22-q23     |
| S1PR1    | HGNC:3165  | 1p21         |
| S1PR3    | HGNC:3167  | 9q22.1-q22.2 |
| SCARB1   | HGNC:1664  | 12q24.32     |
| SHH      | HGNC:10848 | 7q36         |
| SIRT1    | HGNC:14929 | 10q21        |
| SIRT2    | HGNC:10886 | 19q13        |
| SIRT3    | HGNC:14931 | 11p15.5      |
| SIRT4    | HGNC:14932 | 12q24.31     |
| SIRT5    | HGNC:14933 | 6p23         |
| SIRT6    | HGNC:14934 | 19p13.3      |
| SIRT7    | HGNC:14935 | 17q25.3      |
| SKP1     | HGNC:10899 | 5q31         |
| SLC2A1   | HGNC:11005 | 1p34.2       |
| SLC34A2  | HGNC:11020 | 4p15.2       |
| SLITRK6  | HGNC:23503 | 13q31.1      |
| SMO      | HGNC:11119 | 7q32.1       |
| SNAP25   | HGNC:11132 | 20p12-p11.2  |
| SP1      | HGNC:11205 | 12q13.1      |
| SPHK1    | HGNC:11240 | 17q25.2      |
| SPTLC1   | HGNC:11277 | 9q22.31      |
| SPTLC2   | HGNC:11278 | 14q24.3      |
| SPTLC3   | HGNC:16253 | 20p12.1      |
| SRC      | HGNC:11283 | 20q12-q13    |
| SSTR1    | HGNC:11330 | 14q13        |
| SSTR3    | HGNC:11332 | 22q13.1      |
| SSTR5    | HGNC:11334 | 16p13.3      |
| STAT3    | HGNC:11364 | 17q21        |
| STAT5B   | HGNC:11367 | 17q11.2      |
| STEAP1   | HGNC:11378 | 7q21         |
| STK11    | HGNC:11389 | 19p13.3      |
| STX1A    | HGNC:11433 | 7q11.2       |
| SYK      | HGNC:11491 | 9q22         |
| TACC3    | HGNC:11524 | 4p16.3       |
| TASP1    | HGNC:15859 | 20p12        |
| TEK      | HGNC:11724 | 9p21         |
| TERT     | HGNC:11730 | 5p15.33      |
| TGFBR1   | HGNC:11772 | 9q22         |
| TGFBR2   | HGNC:11773 | 3p22         |
| TIAM1    | HGNC:11805 | 21q22.1      |
| TNF      | HGNC:11892 | 6p21.3       |
| TNFRSF4  | HGNC:11918 | 1p36         |
| TNFRSF8  | HGNC:11923 | 1p36         |
| TNFRSF9  | HGNC:11924 | 1p36         |
| TNFSF13B | HGNC:11929 | 13q32-q34    |
| TNKS     | HGNC:11941 | 8p23.1       |
| TOP1     | HGNC:11986 | 20q12-q13.1  |
| TOP2A    | HGNC:11989 | 17q21.2      |



|       |            |                 |
|-------|------------|-----------------|
| TOP2B | HGNC:11990 | 3p24.2          |
| TP53  | HGNC:11998 | 17p13.1         |
| TRIO  | HGNC:12303 | 5p14-p15.1      |
| TRPC6 | HGNC:12338 | 11q22.1         |
| TRPV4 | HGNC:18083 | 12q24.11        |
| TSPO  | HGNC:1158  | 22q13.3         |
| TTK   | HGNC:12401 | 6q14.1          |
| TUBB1 | HGNC:16257 | 20q13.32        |
| TXN   | HGNC:12435 | 9q31            |
| TYMS  | HGNC:12441 | 18p11.31-p11.21 |
| UBA1  | HGNC:12469 | Xp11.23         |
| UCHL5 | HGNC:19678 | 1q32            |
| UGCG  | HGNC:12524 | 9q31            |
| USP10 | HGNC:12608 | 16q24.1         |
| USP13 | HGNC:12611 | 3q26.2-q26.3    |
| USP14 | HGNC:12612 | 18p11.32        |
| USP5  | HGNC:12628 | 12p13           |
| USP7  | HGNC:12630 | 16p13.3         |
| USP9X | HGNC:12632 | Xp11.4          |
| VAMP1 | HGNC:12642 | 12p             |
| VCP   | HGNC:12666 | 9p13.3          |
| VDAC1 | HGNC:12669 | 5q31            |
| VDAC2 | HGNC:12672 | 10q22           |
| VDR   | HGNC:12679 | 12q13.11        |
| VEGFA | HGNC:12680 | 6p12            |
| WEE1  | HGNC:12761 | 11p15.4         |
| WRN   | HGNC:12791 | 8p12            |
| WT1   | HGNC:12796 | 11p13           |
| XIAP  | HGNC:592   | Xq25            |
| XPO1  | HGNC:12825 | 2p15            |
| YES1  | HGNC:12841 | 18p11.31-p11.21 |

## Essential Genes

| Gene  | ID         | Location |
|-------|------------|----------|
| RPL10 | HGNC:10298 | Xq28     |
| RPL7  | HGNC:10363 | 8q13.3   |
| RPS6  | HGNC:10429 | 9p21     |
| SFPQ  | HGNC:10774 | 1p34.3   |
| EIF5B | HGNC:30793 | 2q11.2   |
| EIF3G | HGNC:3274  | 19p13.2  |

**Supplementary Table 4: CLF-PED-015-T shRNA with seed control - hits as identified by RIGER**

| Gene    | NES      | p-value | # Hairpins 500 | shRNA Gene Rank |
|---------|----------|---------|----------------|-----------------|
| RPS6    | 0.004545 | 0.0002  | 5              | Essential gene  |
| RPL7    | 0.01212  | 0.0006  | 5              | Essential gene  |
| RAN     | 0.01818  | 0.0011  | 3              | 1               |
| UBA1    | 0.02045  | 0.0018  | 4              | 2               |
| PSMD2   | 0.02197  | 0.0021  | 3              | 3               |
| POLA1   | 0.0303   | 0.0036  | 4              | 4               |
| EIF3G   | 0.03258  | 0.0044  | 2              | Essential gene  |
| CDK1    | 0.03485  | 0.0046  | 3              | 5               |
| KIF11   | 0.0447   | 0.0079  | 6              | 6               |
| XPO1    | 0.04545  | 0.0082  | 5              | 7               |
| EIF5B   | 0.0553   | 0.0127  | 2              | Essential gene  |
| NR1D1   | 0.06386  | 0.0133  | 2              | 8               |
| HDAC2   | 0.05606  | 0.0134  | 3              | 9               |
| SFPQ    | 0.06364  | 0.0166  | 5              | Essential gene  |
| USP5    | 0.07164  | 0.017   | 2              | 10              |
| PI4KB   | 0.07424  | 0.021   | 2              | 11              |
| CSNK1A1 | 0.07576  | 0.0214  | 2              | 12              |
| KLF5    | 0.0856   | 0.0225  | 3              | 13              |
| PSMB5   | 0.08106  | 0.0251  | 3              | 14              |
| RAD51   | 0.09103  | 0.026   | 3              | 15              |
| RPL10   | 0.09511  | 0.0281  | 3              | Essential gene  |
| CDK4    | 0.09242  | 0.0318  | 3              | 16              |
| WEE1    | 0.1012   | 0.0325  | 4              | 17              |
| WRN     | 0.09394  | 0.0325  | 2              | 18              |
| DHFR    | 0.09773  | 0.0352  | 2              | 19              |
| PSMD1   | 0.1045   | 0.041   | 4              | 20              |
| TXN     | 0.1068   | 0.0421  | 4              | 21              |

**Supplementary Table 5: A549 shRNA with seed control - hits as identified by RIGER**

| <b>Gene</b> | <b>NES</b> | <b>p-value</b> | <b># Hairpins 500</b> | <b>shRNA Gene Rank</b> |
|-------------|------------|----------------|-----------------------|------------------------|
| RPS6        | 0.01138    | 0.0009         | 5                     | Essential gene         |
| VCP         | 0.01214    | 0.001          | 3                     | 1                      |
| PSMB5       | 0.01551    | 0.001          | 2                     | 2                      |
| SFPQ        | 0.01442    | 0.0013         | 5                     | Essential gene         |
| EIF3G       | 0.02049    | 0.0023         | 3                     | Essential gene         |
| MTOR        | 0.02807    | 0.0024         | 3                     | 3                      |
| PSMD1       | 0.02656    | 0.0035         | 5                     | 4                      |
| PSMD2       | 0.02731    | 0.0037         | 5                     | 5                      |
| CDK1        | 0.02807    | 0.0041         | 4                     | 6                      |
| AURKB       | 0.03304    | 0.0045         | 4                     | 7                      |
| EWSR1       | 0.03978    | 0.0062         | 4                     | 8                      |
| UBA1        | 0.04173    | 0.0066         | 4                     | 9                      |
| HSP90B1     | 0.04249    | 0.0067         | 4                     | 10                     |
| XPO1        | 0.04316    | 0.0069         | 5                     | 11                     |
| KIF11       | 0.04932    | 0.009          | 3                     | 12                     |
| BRD4        | 0.05311    | 0.0103         | 5                     | 13                     |
| POLE        | 0.05387    | 0.011          | 2                     | 14                     |
| NEDD8       | 0.05463    | 0.0113         | 2                     | 15                     |
| CSNK1A1     | 0.06146    | 0.0141         | 4                     | 16                     |
| CLTC        | 0.06677    | 0.0161         | 4                     | 17                     |
| TACC3       | 0.07208    | 0.0183         | 2                     | 18                     |
| KPNB1       | 0.0736     | 0.0189         | 4                     | 19                     |
| CA6         | 0.07436    | 0.0197         | 2                     | 20                     |
| RPTOR       | 0.07511    | 0.0202         | 2                     | 21                     |
| RPL7        | 0.07891    | 0.0223         | 7                     | Essential gene         |
| DDB1        | 0.08118    | 0.0243         | 4                     | 22                     |
| PSMB1       | 0.08801    | 0.0279         | 5                     | 23                     |
| POLA1       | 0.08953    | 0.0288         | 5                     | 24                     |
| SPTLC2      | 0.09105    | 0.0301         | 2                     | 25                     |
| USP7        | 0.0971     | 0.0304         | 4                     | 26                     |
| ERBB2       | 0.09181    | 0.0306         | 5                     | 27                     |
| RRM1        | 0.09408    | 0.032          | 3                     | 28                     |
| RAD51       | 0.1005     | 0.0321         | 3                     | 29                     |
| RAN         | 0.09788    | 0.0338         | 4                     | 30                     |
| PTK2        | 0.09939    | 0.0344         | 4                     | 31                     |
| TTK         | 0.1032     | 0.0349         | 3                     | 32                     |
| PI4KB       | 0.1024     | 0.036          | 3                     | 33                     |
| VDR         | 0.1039     | 0.0366         | 3                     | 34                     |
| BCL2L1      | 0.1062     | 0.0382         | 4                     | 35                     |
| CUL1        | 0.1092     | 0.0397         | 3                     | 36                     |

**Supplementary Table 6: CLF-PED-015-T CRISPR hits as identified by RIGER**

| Gene    | NES      | p-value | # Hairpins 500 | CRISPR Gene Rank |
|---------|----------|---------|----------------|------------------|
| SP1     | 0.004428 | 0.0002  | 4              | 1                |
| RAN     | 0.008856 | 0.0003  | 7              | 2                |
| RPS6    | 0.009594 | 0.0003  | 7              | Essential gene   |
| USP5    | 0.01402  | 0.001   | 6              | 3                |
| TOP2A   | 0.0155   | 0.0013  | 6              | 4                |
| RPL7    | 0.01771  | 0.0019  | 5              | Essential gene   |
| CSNK1D  | 0.02583  | 0.0041  | 4              | 5                |
| UBA1    | 0.02804  | 0.0047  | 5              | 6                |
| POLE    | 0.02952  | 0.0048  | 6              | 7                |
| WEE1    | 0.03026  | 0.0049  | 4              | 8                |
| CDK4    | 0.03173  | 0.0053  | 5              | 9                |
| MYC     | 0.03838  | 0.0067  | 6              | 10               |
| KPNB1   | 0.04354  | 0.0087  | 5              | 11               |
| KIF11   | 0.04428  | 0.0091  | 5              | 12               |
| USP7    | 0.04723  | 0.0104  | 6              | 13               |
| STK11   | 0.05314  | 0.0131  | 7              | 14               |
| USP9X   | 0.05387  | 0.0132  | 6              | 15               |
| RPTOR   | 0.05535  | 0.0139  | 5              | 16               |
| HMGCS1  | 0.06421  | 0.0192  | 6              | 17               |
| RRM1    | 0.06716  | 0.0197  | 6              | 18               |
| ACTB    | 0.06863  | 0.0206  | 5              | 19               |
| DHFR    | 0.07085  | 0.0213  | 4              | 20               |
| CSNK1A1 | 0.07454  | 0.023   | 4              | 21               |
| FNTA    | 0.07675  | 0.024   | 4              | 22               |
| EIF3G   | 0.07823  | 0.0247  | 6              | Essential gene   |
| PSMB5   | 0.08339  | 0.0281  | 4              | 23               |
| EWSR1   | 0.08487  | 0.029   | 4              | 24               |
| PLK1    | 0.09004  | 0.0319  | 5              | 25               |
| XPO1    | 0.09151  | 0.0324  | 6              | 26               |
| BRD4    | 0.09299  | 0.0331  | 6              | 27               |
| DDB1    | 0.09446  | 0.0342  | 4              | 28               |
| CMPK1   | 0.0952   | 0.0348  | 4              | 29               |
| SFPQ    | 0.1033   | 0.0405  | 6              | Essential gene   |
| TACC3   | 0.1085   | 0.0435  | 4              | 30               |
| MDM2    | 0.1107   | 0.0448  | 4              | 31               |
| VCP     | 0.1137   | 0.0472  | 4              | 32               |
| AR      | 1.91     | 1       | 0              |                  |
| TP53    | 2.51     | 1       | 0              |                  |
| GNRH1   | 2.02     | 1       | 0              |                  |
| CA13    | 2.03     | 1       | 0              |                  |

**Supplementary Table 7: Comparison of shRNA and CRISPR hits for CLF-PED-015-T**

| <b>Gene</b> | <b>shRNA Gene Rank</b> | <b>CRISPR Gene Rank</b> |
|-------------|------------------------|-------------------------|
| RPS6        | Essential gene         | Essential gene          |
| RPL7        | Essential gene         | Essential gene          |
| RAN         | 1                      | 2                       |
| UBA1        | 2                      | 6                       |
| PSMD2       | 3                      |                         |
| POLA1       | 4                      |                         |
| EIF3G       | Essential gene         | Essential gene          |
| CDK1        | 5                      |                         |
| KIF11       | 6                      | 12                      |
| XPO1        | 7                      | 26                      |
| EIF5B       | Essential gene         |                         |
| NR1D1       | 8                      |                         |
| HDAC2       | 9                      |                         |
| SFPQ        | Essential gene         | Essential gene          |
| USP5        | 10                     | 3                       |
| PI4KB       | 11                     |                         |
| CSNK1A1     | 12                     | 21                      |
| KLF5        | 13                     |                         |
| PSMB5       | 14                     | 23                      |
| RAD51       | 15                     |                         |
| RPL10       | Essential gene         |                         |
| CDK4        | 16                     | 9                       |
| WEE1        | 17                     | 8                       |
| WRN         | 18                     |                         |
| DHFR        | 19                     | 20                      |
| PSMD1       | 20                     |                         |
| TXN         | 21                     |                         |

**Supplementary Table 8: A549 CRISPR hits as identified by RIGER**

| Gene    | NES      | p-value | # Hairpins 500 | CRISPR Gene Rank |
|---------|----------|---------|----------------|------------------|
| UBA1    | 0.00369  | 0.0002  | 7              | 1                |
| CDK7    | 0.005166 | 0.0002  | 6              | 2                |
| USP5    | 0.009594 | 0.0003  | 6              | 3                |
| RAN     | 0.01624  | 0.0014  | 6              | 4                |
| RPL7    | 0.02214  | 0.0031  | 7              | Essential gene   |
| MYC     | 0.02288  | 0.0035  | 7              | 5                |
| ATR     | 0.02362  | 0.0037  | 5              | 6                |
| WEE1    | 0.02509  | 0.0039  | 4              | 7                |
| DDB1    | 0.02804  | 0.0047  | 7              | 8                |
| HMGCS1  | 0.03247  | 0.0053  | 6              | 9                |
| USP7    | 0.03616  | 0.0059  | 6              | 10               |
| VCP     | 0.0369   | 0.0062  | 7              | 11               |
| RPS6    | 0.04133  | 0.0075  | 6              | Essential gene   |
| SFPQ    | 0.04354  | 0.0087  | 7              | Essential gene   |
| ACTB    | 0.04576  | 0.0097  | 7              | 12               |
| CUL1    | 0.04871  | 0.0111  | 5              | 13               |
| NEDD8   | 0.05092  | 0.0115  | 6              | 14               |
| PSMB5   | 0.05166  | 0.0122  | 6              | 15               |
| RPTOR   | 0.05535  | 0.0139  | 7              | 16               |
| MTOR    | 0.05609  | 0.0141  | 7              | 17               |
| TOP2A   | 0.05683  | 0.0144  | 6              | 18               |
| FNTB    | 0.05904  | 0.0157  | 7              | 19               |
| XPO1    | 0.06052  | 0.017   | 7              | 20               |
| RPL10   | 0.06125  | 0.0174  | 7              | Essential gene   |
| KPNB1   | 0.06199  | 0.0177  | 7              | 21               |
| ATP1A1  | 0.06937  | 0.021   | 7              | 22               |
| EIF3G   | 0.07085  | 0.0213  | 5              | Essential gene   |
| NAE1    | 0.07232  | 0.0222  | 6              | 23               |
| CDK9    | 0.0738   | 0.0229  | 7              | 24               |
| TXN     | 0.0797   | 0.0253  | 5              | 25               |
| RAD51   | 0.08044  | 0.0255  | 4              | 26               |
| CLTC    | 0.08118  | 0.0261  | 6              | 27               |
| HSP90B1 | 0.08192  | 0.0271  | 5              | 28               |
| PSMB2   | 0.08339  | 0.0281  | 6              | 29               |
| BIRC5   | 0.08413  | 0.0287  | 6              | 30               |
| MDM2    | 0.09373  | 0.0337  | 5              | 31               |
| POLA2   | 0.0952   | 0.0348  | 4              | 32               |
| CDK1    | 0.1004   | 0.0381  | 6              | 33               |
| KRAS    | 0.1048   | 0.0412  | 7              | 34               |
| BRD4    | 0.107    | 0.0429  | 4              | 35               |

|        |        |        |   |    |
|--------|--------|--------|---|----|
| KIF11  | 0.1077 | 0.0434 | 6 | 36 |
| BCL2L1 | 0.1122 | 0.046  | 7 | 37 |
| AURKB  | 0.1137 | 0.0472 | 4 | 38 |
| TP53   | 2.29   | 1      | 0 |    |
| CHEK2  | 2.08   | 1      | 0 |    |
| NOTCH2 | 1.97   | 1      | 0 |    |



**Supplementary Table 9:** Comparison of shRNA and CRISPR hits for A549

| <b>Gene</b> | <b>shRNA Gene Rank</b> | <b>CRISPR Gene Rank</b> |
|-------------|------------------------|-------------------------|
| RPS6        | Essential gene         | Essential gene          |
| VCP         | 1                      | 11                      |
| PSMB5       | 2                      | 15                      |
| SFPQ        | Essential gene         | Essential gene          |
| EIF3G       | Essential gene         | Essential gene          |
| MTOR        | 3                      | 17                      |
| PSMD1       | 4                      |                         |
| PSMD2       | 5                      |                         |
| CDK1        | 6                      | 33                      |
| AURKB       | 7                      | 38                      |
| EWSR1       | 8                      |                         |
| UBA1        | 9                      | 1                       |
| HSP90B1     | 10                     | 28                      |
| XPO1        | 11                     | 20                      |
| KIF11       | 12                     | 36                      |
| BRD4        | 13                     | 35                      |
| POLE        | 14                     |                         |
| NEDD8       | 15                     | 14                      |
| CSNK1A1     | 16                     |                         |
| CLTC        | 17                     | 27                      |
| TACC3       | 18                     |                         |
| KPNB1       | 19                     | 21                      |
| CA6         | 20                     |                         |
| RPTOR       | 21                     | 16                      |
| RPL7        | Essential gene         | Essential gene          |
| DDB1        | 22                     | 8                       |
| PSMB1       | 23                     |                         |
| POLA1       | 24                     |                         |
| SPTLC2      | 25                     |                         |
| USP7        | 26                     | 10                      |
| ERBB2       | 27                     |                         |
| RRM1        | 28                     |                         |
| RAD51       | 29                     | 26                      |
| RAN         | 30                     | 4                       |
| PTK2        | 31                     |                         |
| TTK         | 32                     |                         |
| PI4KB       | 33                     |                         |
| VDR         | 34                     |                         |

|        |    |    |
|--------|----|----|
| BCL2L1 | 35 | 37 |
| CUL1   | 36 | 13 |

**Supplementary Table 10:** Listing of Broad CTD2 440 compound plates

| PROJ_CPD_NAME                                              | STATUS   | TARGET_NODES                        |
|------------------------------------------------------------|----------|-------------------------------------|
| Zebularine                                                 | probe    | CDA;DNMT1                           |
| EPZ004777 analog                                           | probe    | DOT1L                               |
| importazole                                                | probe    | KPNB1                               |
| SR8278                                                     | probe    | NR1D1                               |
| BXL-628;elocalcitol                                        | clinical | VDR                                 |
| ML204                                                      | probe    | IDH1                                |
| docetaxel;Taxotere                                         | FDA      | TUBB1;BCL2                          |
| cyclophosphamide;Endoxan;Cytoxan;Neosar;Procytox;Revimmune | FDA      |                                     |
| nutlin-3                                                   | clinical | MDM2                                |
| NVP-231                                                    | probe    | CERK                                |
| triptolide                                                 | clinical |                                     |
| avicin D                                                   | probe    | NR3C1                               |
| Bax channel blocker;BRD3547                                | probe    | BAX                                 |
| CCT036477;BRD7170                                          | probe    |                                     |
| erastin                                                    | probe    | VDAC1;VDAC2                         |
| curcubitin I;JSI-124                                       | probe    | NFKB1                               |
| paclitaxel;taxol                                           | FDA      | TUBB1                               |
| hyperforin                                                 | clinical | TRPC6                               |
| brefeldin A                                                | probe    | ARF1                                |
| itraconazole;Sporanox                                      | FDA      |                                     |
| dexamethasone;Decadron                                     | FDA      | NR3C1                               |
| teniposide;Vumon;VM-26                                     | FDA      | TOP2A;TOP2B                         |
| ML162;BRD5421                                              | probe    |                                     |
| necrostatin-1                                              | probe    | RIPK1                               |
| SN-38;7-ethyl-10-hydroxycamptothecin                       | probe    | TOP1                                |
| ciclosporin;cyclosporin                                    | FDA      |                                     |
| TGX-221                                                    | probe    | PIK3CB                              |
| bleomycin                                                  | FDA      |                                     |
| 968                                                        | probe    | GLS                                 |
| fluvastatin;Lescol                                         | FDA      | HMGCR                               |
| PX-12;IV-2                                                 | clinical | TXN                                 |
| PD318088                                                   | probe    | MAP2K1;MAP2K2                       |
| Col-3                                                      | clinical | MMP1                                |
| YK-4-279                                                   | probe    | ERG;ETV1;EWSR1;FLI1                 |
| fumonisin B1                                               | probe    | CERS1;CERS2;CERS3;CERS4;CERS5;CERS6 |
| ifosfamide;Ifex                                            | FDA      |                                     |
| salermide                                                  | probe    | SIRT1;SIRT2                         |
| BCL-LZH-4                                                  | probe    | BCL2L1                              |
| isoevodiamine;evodiamine                                   | probe    |                                     |
| lovastatin acid;NP-001236;Mevacor;Altocor;Altoprev         | FDA      | HMGCR                               |
| MH2075                                                     | probe    | IDH1                                |
| blebbistatin                                               | probe    | MYH1;MYH2                           |
| myriocin;antibiotic ISP-1;thermozymocidin                  | probe    | SPTLC1;SPTLC2;SPTLC3                |

|                                                       |           |                                      |
|-------------------------------------------------------|-----------|--------------------------------------|
| IPR-456                                               | probe     | PLAUR                                |
| NSC23766                                              | probe     | RAC1;TRIO;TIAM1                      |
| oligomycin A                                          | probe     | ATP5L2                               |
| ML258                                                 | probe     | BCL2L10                              |
| fulvestrant;Faslodex                                  | FDA       | ESR1                                 |
| CID-5951923                                           | probe     | KLF5                                 |
| thalidomide                                           | FDA       | KDR;TNF                              |
| temozolomide;Methazolastone;Temodar;Temodal           | FDA       |                                      |
| cyanquinoline 11                                      | clinical  | MAP3K8;EGFR                          |
| RITA;NSC652287                                        | probe     | TP53;MDM2                            |
| tubastatin A                                          | probe     | HDAC6                                |
| BRD-K01121114                                         | probe     |                                      |
| LRRK2-IN-1                                            | probe     | LRRK2                                |
| SP600125                                              | probe     | MAPK8;MAPK9;MAPK10                   |
| BRD-K01737880                                         | probe     |                                      |
| ML210;TL-HRAS-61                                      | probe     |                                      |
| NVP-BSK805                                            | probe     | JAK2                                 |
| olaparib;AZD-2281;KU-0059436                          | clinical  | PARP1;PARP2                          |
| panobinostat;THM-1-91;LBH-589                         | clinical  | HDAC1;HDAC2;HDAC3;HDAC6;HDAC8        |
| BRD-K02251932                                         | GE-active |                                      |
| parbendazole                                          | probe     |                                      |
| QS-11                                                 | probe     | ARFGAP1                              |
| SM-406;AT-406                                         | probe     | XIAP;BIRC2;BIRC3                     |
| SU11274                                               | probe     | MET                                  |
| HC-067047                                             | probe     | TRPV4                                |
| azacitidine                                           | FDA       | DNMT1                                |
| foretinib;XL880;EXEL-2880;GSK1363089;GSK089           | clinical  | MET;KDR                              |
| Merck60;BRD6929                                       | probe     | HDAC1;HDAC2                          |
| BIBR-1532                                             | probe     | TERT                                 |
| BRD-K04800985                                         | GE-active |                                      |
| BMS-270394                                            | probe     | RARG                                 |
| BIO;6-bromoindirubin-3'-oxime;6BIO                    | probe     | JAK1;JAK2;JAK3;GSK3B                 |
| ML030;triazolothiadiazine                             | probe     | PDE4A;PDE4B;PDE4D                    |
| BRD9647                                               | probe     |                                      |
| PDMP;1-phenyl-2-decanoylamino-3-morpholino-1-propanol | probe     | UGCG                                 |
| LE-135                                                | probe     | RARB                                 |
| GSK1059615                                            | clinical  | MTOR;PIK3CA;PIK3CB;PIK3CD;PIK3CG     |
| narciclasine                                          | probe     | RHOA                                 |
| AM-580                                                | probe     | RARA;RARB;RARG                       |
| AA-COCF3;arachidonyl trifluoromethyl ketone           | probe     | PLA2G4A;PLA2G4B;PLA2G4C;PLA2G4D;FAAH |
| GSK525762A;I-BET                                      | probe     | BRD2;BRD3;BRD4                       |
| temsirolimus;CCI-779;Torisel                          | FDA       | MTOR                                 |
| SID-26681509;BRD7745                                  | probe     | CTSL1                                |
| linsitinib                                            | clinical  | IGF1R;IGF1                           |
| N-hexanoyl-D-sphingosine;C6-ceramide                  | probe     | UGCG;MAPK1;PPP2CA                    |

|                                                                             |           |                                        |
|-----------------------------------------------------------------------------|-----------|----------------------------------------|
| BRD-K09344309                                                               | probe     |                                        |
| GANT-61                                                                     | probe     | GLI1;SMO                               |
| KU-0060648                                                                  | probe     | PRKDC                                  |
| BRD-K09587429                                                               | GE-active |                                        |
| FGIN-1-27                                                                   | probe     | TSPO                                   |
| PRL-3 inhibitor I;BRD7482                                                   | probe     | PTP4A3                                 |
| dabrafenib;dabrafenib mesylate;GSK2118436                                   | clinical  | BRAF                                   |
| GW-405833;L-768,242                                                         | probe     | CB2                                    |
| BO2                                                                         | probe     | RAD51                                  |
| BRD-K11533227                                                               | probe     | HDAC1;HDAC2                            |
| PF-184                                                                      | probe     | IKBKB                                  |
| carboplatin                                                                 | FDA       |                                        |
| AT7867                                                                      | probe     | AKT1;AKT2;AKT3;RPS6KB2                 |
| BEZ235;NVP-BEZ235                                                           | clinical  | MTOR;PIK3CA;PIK3CB;PIK3CD;PIK3CG       |
| trametinib;GSK1120212;JTP-74057                                             | clinical  | MAP2K1;MAP2K2                          |
| TG-101348;SAR302503                                                         | clinical  | JAK2                                   |
| valdecoxib;Bextra                                                           | FDA       | PTGS2                                  |
| procarbazine;Matulane                                                       | FDA       |                                        |
| ciclopirox olamine;Loprox                                                   | FDA       | RRM1                                   |
| BMS-754807                                                                  | probe     | IGF1R                                  |
| BMS-345541                                                                  | probe     | IKBKB                                  |
| dinaciclib;SCH727965                                                        | clinical  | CDK1;CDK2;CDK5;CDK9                    |
| BRD-K13999467                                                               | GE-active |                                        |
| BRD-K14844214                                                               | GE-active |                                        |
| R428                                                                        | probe     | AXL                                    |
| gemcitabine                                                                 | FDA       | RRM1;TYMS;CMPK                         |
| NVP-ADW742                                                                  | probe     | IGF1R                                  |
| PRIMA-1                                                                     | probe     | TP53                                   |
| phloretin;dihydronaringenin;Phloretol;naringenin chalcone                   | probe     |                                        |
| obatoclax                                                                   | clinical  | BCL2;MCL1;BCL2L1                       |
| CHIR-99021;CT99021                                                          | probe     | GSK3A;GSK3B                            |
| PLX-4720                                                                    | probe     | BRAF                                   |
| regorafenib;BAY-73-4506;Stivarga                                            | FDA       | FLT1;KDR;FLT4;PDGFRB;KIT;RET;RAF1      |
| sotrastaurin;AEB071                                                         | clinical  | PRKCB                                  |
| BRD-K17060750                                                               | GE-active |                                        |
| bendamustine;bendamustine hydrochloride;Treakisym;Ribomustin;Levact;Treanda | FDA       |                                        |
| SCH-79797                                                                   | probe     | F2R                                    |
| HLL-373;DPD                                                                 | probe     | MDM2                                   |
| indisulam;E7070                                                             | clinical  | CA1;CA2;CA3;CA4;CA7;CA9;CA12;CA13;CA14 |
| belinostat;PXD-101                                                          | clinical  | HDAC1;HDAC2;HDAC3;HDAC6;HDAC8          |
| TL-32711                                                                    | clinical  | DIABLO;XIAP                            |
| MK-0752                                                                     | clinical  | NCSTN;PSEN1;PSENEN;APH1A               |
| BRD-K19103580                                                               | GE-active |                                        |
| gossypol                                                                    | clinical  | BAX;BCL2;PRKCI                         |
| prochlorperazine;prochlorperazine dimaleate;Compazine                       | FDA       | DRD2                                   |

|                                                    |           |                                    |
|----------------------------------------------------|-----------|------------------------------------|
| sitagliptin                                        | FDA       | DPP4                               |
| SGX-523                                            | clinical  | MET                                |
| saracatinib;AZD0530                                | clinical  | SRC;ABL1                           |
| lapatinib;GW572016;GW2016;Tykerb;Tyverb            | FDA       | EGFR;ERBB2                         |
| NVP-LDE225;BRD6430                                 | probe     | PARP1;PARP2                        |
| MST-312                                            | probe     | TERT                               |
| R-406                                              | clinical  | SYK                                |
| SKI-II                                             | probe     | SPHK1                              |
| KW 2449                                            | clinical  | FLT3;ABL1;AURKA                    |
| RO4929097                                          | clinical  | NCSTN;PSEN1;PSENEN;APH1A           |
| simvastatin;Zocor                                  | FDA       | HMGCR                              |
| STF-31                                             | probe     | SLC2A1                             |
| 1S,3R-RSL-3                                        | probe     |                                    |
| sorafenib;BAY-43-9006;Nexavar                      | FDA       | BRAF;RAF1;KDR;FLT3;FLT4;PDGFRB;KIT |
| piperlongumine                                     | probe     |                                    |
| SCH-529074                                         | probe     | TP53                               |
| FSC231                                             | probe     | PICK1                              |
| fluorouracil;Acrucil;5-fluorouracil;5-FU;Efudex    | FDA       | TYMS                               |
| KU-55933                                           | probe     | ATM                                |
| OSI-930                                            | clinical  | MET;KDR                            |
| CD-1530                                            | probe     | RARG                               |
| BRD-K26531177                                      | probe     |                                    |
| PD 153035                                          | probe     | EGFR                               |
| cytochalasin B                                     | probe     |                                    |
| BIX-01294                                          | probe     | EHMT2                              |
| BRD-K27224038                                      | GE-active |                                    |
| leptomycin B                                       | probe     | XPO1                               |
| lomeguatrib                                        | clinical  | MGMT                               |
| BRD-K27986637                                      | probe     |                                    |
| TW-37                                              | probe     | BCL2;BCL2L1                        |
| AZD4547                                            | clinical  | FGFR1;FGFR2;FGFR3                  |
| brivanib;BMS-582664                                | clinical  | KDR                                |
| naphthofuran compound 5                            | probe     | HNF4A                              |
| CD-437;AHPN                                        | probe     | RARG                               |
| BRD-K29086754                                      | GE-active |                                    |
| BRD-K29313308                                      | probe     | HDAC3                              |
| PIK-93                                             | probe     | PIK3CG;PI4KB                       |
| chlorambucil;Leukeran                              | FDA       |                                    |
| NSC30930;5-(benzyloxy)-1H-indole-2-carboxylic acid | probe     |                                    |
| axitinib;AG013736;Inlyta                           | FDA       | KDR;FLT4                           |
| KX2-391;KX01                                       | clinical  | SRC                                |
| BRD-K30019337                                      | GE-active |                                    |
| compound 1452A;BRD4966                             | probe     | CASP3;CASP6;CASP7                  |
| CDK9 inhibitor 14                                  | probe     | CDK9                               |
| VU0155056                                          | probe     | PLD1                               |

|                                                         |           |                                                         |
|---------------------------------------------------------|-----------|---------------------------------------------------------|
| peranib-2                                               | probe     | ASAH1;ASAH2;ASAH2B;ASAH2C;ACER1;ACER2;ACER3             |
| VER-155008                                              | probe     | HSPA1A;HSPA1B;HSPA1L                                    |
| AGK-2                                                   | probe     | SIRT2                                                   |
| cytarabine;cytosine arabinoside;Cytosar-U;Depocyt;Ara-C | FDA       |                                                         |
| BRD-K33199242                                           | GE-active |                                                         |
| tivantinib;ARQ-197                                      | clinical  | MET                                                     |
| BRD-K33514849                                           | probe     |                                                         |
| isoliquirigenin;GU 17                                   | probe     | SIRT1                                                   |
| clofarabine;Clolar                                      | FDA       | POLA1;POLA2;POLE;RRM1                                   |
| BRD-K34099515                                           | probe     |                                                         |
| cimetidine;Tagamet                                      | FDA       | HRH2                                                    |
| BRD-K34222889                                           | probe     |                                                         |
| BRD-K34485477                                           | GE-active |                                                         |
| BMS-536924                                              | probe     | IGF1R;INSR                                              |
| dacarbazine;DTIC-Dome                                   | FDA       |                                                         |
| ouabain                                                 | probe     | ATP1A1;ATP1A2;ATP1A3;ATP1A4;ATP1B1;ATP1B2;ATP1B3;ATP1B4 |
| BRD6340                                                 | probe     | MYC                                                     |
| darinaparsin                                            | clinical  |                                                         |
| niclosamide;Niclocide                                   | FDA       | STAT3                                                   |
| KU-60019                                                | probe     | ATM                                                     |
| GSK1210151A;I-BET151                                    | probe     | BRD2;BRD3;BRD4                                          |
| StemRegenin 1;SR1                                       | probe     | AHR                                                     |
| BRD-K37390332                                           | GE-active |                                                         |
| SB-525334                                               | probe     | TGFBR1                                                  |
| PF-3758309                                              | probe     | PAK4                                                    |
| etoposide                                               | FDA       | TOP2A                                                   |
| LY-2183240                                              | probe     | FAAH                                                    |
| NSC19630                                                | probe     | WRN                                                     |
| lenvatinib;E7080                                        | FDA       | KDR;FLT4                                                |
| S3I-201;NSC74859                                        | probe     | STAT3                                                   |
| BRD-K41334119                                           | GE-active |                                                         |
| BRD-K41597374                                           | GE-active |                                                         |
| palmostatin B                                           | probe     | LYPLA1                                                  |
| MM_V_GSK_2d1                                            | probe     | EZH2                                                    |
| sunitinib;Sutent;SU11248                                | FDA       | FLT1;KDR;FLT4;FLT3;PDGFRB;KIT;RET;CSF1R                 |
| myricetin                                               | probe     | STX1A;VAMP1;SNAP25                                      |
| SNS-032;BMS-387032                                      | clinical  | CDK2;CDK7;CDK9                                          |
| MLN-2480                                                | clinical  | ARAF;BRAF;RAF1                                          |
| PF-4800567 hydrochloride                                | probe     | CSNK1D;CSNK1E                                           |
| WP1130                                                  | probe     | USP9X;USP5;USP14;UCHL5                                  |
| BRD-K44224150                                           | GE-active |                                                         |
| ASN-05257430;T6909415;BRD1590                           | probe     | PKM                                                     |
| pandacostat                                             | probe     | HDAC1;HDAC2;HDAC3;HDAC6;HDAC8                           |
| betulinic acid                                          | probe     | SP1                                                     |

|                                                                     |           |                                                    |
|---------------------------------------------------------------------|-----------|----------------------------------------------------|
| BRD-K45681478                                                       | probe     |                                                    |
| NSC48300                                                            | probe     | TASP1                                              |
| IU1                                                                 | probe     | USP14                                              |
| BMS-195614                                                          | probe     | RARA;RARB;RARG                                     |
| Ki8751                                                              | probe     | KIT;KDR;PDGFRA;FGFR2                               |
| GMX-1778;CHS-828                                                    | clinical  | NAMPT                                              |
| Repligen 136                                                        | probe     | HDAC3                                              |
| SR1001                                                              | probe     | RORA;RORC                                          |
| BRD-K48334597                                                       | GE-active |                                                    |
| nintedanib;BIBF 1120;Vargatef                                       | clinical  | FLT1;KDR;FLT4;PDGFRA;PDGFRB;FGFR1;FGFR2;FGFR3      |
| GSK-2636771                                                         | clinical  | PIK3CB                                             |
| BRD-K49290616                                                       | GE-active |                                                    |
| dasatinib;BMS-354825;Sprycel                                        | FDA       | ABL1;SRC;EPHA2;LCK;YES1;KIT;PDGFRB;STAT5B;ABL2;FYN |
| PRIMA-1-Met;APR-246                                                 | probe     | TP53                                               |
| abiraterone;Zytiga                                                  | FDA       | CYP17A1                                            |
| sildenafil;Viagra;Revatio                                           | FDA       | PDE5A                                              |
| NVP-TAE684                                                          | probe     | ALK                                                |
| necrostatin-7                                                       | probe     |                                                    |
| canertinib;CI-1033                                                  | clinical  | EGFR;ERBB2                                         |
| HBX-41108                                                           | probe     | USP7                                               |
| BRD-K50799972                                                       | GE-active |                                                    |
| BRD-K51490254                                                       | probe     | HDAC6;HDAC8                                        |
| cabozantinib;Cometriq;XL184;BMS-907351                              | FDA       | MET;FLT3;KDR;KIT;TEK                               |
| TPCA-1                                                              | probe     | NFKB1                                              |
| IKK-3 inhibitor IX                                                  | probe     | IKBKE                                              |
| BRD-K52037352                                                       | GE-active |                                                    |
| cerulenin                                                           | probe     | FASN;HMGCS1                                        |
| CI-994                                                              | probe     | HDAC1;HDAC2;HDAC3;HDAC6;HDAC8                      |
| methylstat                                                          | probe     | KDM3A;KDM4A;KDM4B;KDM4C;KDM4D;JMJD6                |
| AZD7545                                                             | probe     | PDK2                                               |
| GDC-0941                                                            | clinical  | PIK3CA;PIK3CB;PIK3CD;PIK3CG                        |
| Chembridge cat# 7667791                                             | probe     | TNKS                                               |
| tivozanib;AV-951;BRD4658                                            | clinical  | KDR                                                |
| BEC;S-(2-boronoethyl)-L-cysteine                                    | probe     | ARG1;ARG2                                          |
| SRT-1720                                                            | probe     | SIRT1                                              |
| BRD3639;ChEMBL1222381;neuronal differentiation inducer III.;NDI III | probe     | NEUROD1;NEUROD2                                    |
| ruxolitinib;INCB018424;Jakafi;Jakavi                                | FDA       | JAK1;JAK2                                          |
| MK-1775                                                             | clinical  | WEE1                                               |
| JQ-1                                                                | probe     | BRDT                                               |
| WAY-362450;FXR450                                                   | probe     | NR1H4                                              |
| BYL-719                                                             | clinical  | PIK3CA                                             |
| BRD-K55116708                                                       | probe     |                                                    |
| SZ4TA2                                                              | probe     | BCL2L1                                             |
| rigosertib;ON-01910;Estybon;Novonex                                 | clinical  | PLK1                                               |
| BRD-K55478147                                                       | probe     | HDAC6                                              |



|                                                 |          |                               |
|-------------------------------------------------|----------|-------------------------------|
| epigallocatechin-3-monogallate                  | probe    |                               |
| topotecan;Hycamtin                              | FDA      | TOP1                          |
| MGCD-265                                        | clinical | FLT1;KDR;FLT4;MET;TEK         |
| ABT-737                                         | clinical | BCL2;BCL2L1;BCL2L2            |
| vemurafenib;PLX-4032;RG7204;Zelboraf;RO5185426  | FDA      | BRAF                          |
| selumetinib;AZD6244                             | clinical | MAP2K1;MAP2K2                 |
| marinopyrrole A;maritoclax                      | probe    | MCL1;ACTB                     |
| AT13387                                         | clinical | HSP90AA1                      |
| APO866;FK866;BRD0667                            | clinical | NAMPT                         |
| AZD6482                                         | clinical | PIK3CB                        |
| AZ-3146;Mps1-IN-2                               | probe    | TTK                           |
| DBeQ                                            | probe    | VCP                           |
| tozasertib;VX-680;MK-0457                       | clinical | AURKA;AURKB;AURKC             |
| bardoxolone methyl;CDDO-methyl ester            | clinical |                               |
| methotrexate;Abitrexate                         | FDA      | DHFR                          |
| Mitomycin C                                     | FDA      |                               |
| BRD2020;CHEMBL374350                            | probe    | NFKB1                         |
| JNJ-26854165;Serdemetan                         | clinical | MDM2                          |
| PYR-41                                          | probe    | UBA1                          |
| CAL-101                                         | clinical | PIK3CD                        |
| Mdivi-1                                         | probe    | DNM1                          |
| BRD-K61166597                                   | probe    | HDAC1;HDAC2                   |
| SB-225002                                       | probe    | CXCR2                         |
| CAY10594;compound 72                            | probe    | PLD2                          |
| compound 7d-cis;BRD9047                         | probe    | XPO1                          |
| SB-743921                                       | clinical | KIF11                         |
| ABT-199                                         | clinical | BCL2                          |
| HMN-214                                         | probe    | PLK1                          |
| tipifarnib-P2                                   | probe    | FNTA                          |
| ZSTK474                                         | clinical | PIK3CG                        |
| tipifarnib-P1;Zarnestra                         | clinical | FNTA                          |
| BRD-K63431240                                   | probe    |                               |
| barasertib;AZD1152-HQPA                         | clinical | AURKB                         |
| gefitinib;ZD-1839;Iressa                        | FDA      | AKT1;EGFR                     |
| necrosulfonamide                                | probe    |                               |
| MI-1                                            | probe    | MEN1;MLL                      |
| apicidin                                        | probe    | HDAC1;HDAC2;HDAC3;HDAC6;HDAC8 |
| ATRA;all-trans retinoic acid;tretinoin;Vesanoid | FDA      | RARA;RARB;RARG                |
| Ko-143                                          | probe    | ABCG2                         |
| TG100-115                                       | clinical | PIK3CD;PIK3CG                 |
| PHA-793887                                      | clinical | CDK1;CDK2;CDK4;CDK5;CDK7;CDK9 |
| BI-2536                                         | clinical | PLK1                          |
| semagacestat;LY450139                           | clinical | NCSTN;PSEN1;PSENEN;APH1A      |
| AZD1480                                         | clinical | JAK1;JAK2                     |
| afatinib;BIBW2992                               | clinical | EGFR;ERBB2                    |
| KH-CB19                                         | probe    | CLK1;CLK4                     |

|                                                            |           |                                        |
|------------------------------------------------------------|-----------|----------------------------------------|
| BRD-K66453893                                              | GE-active |                                        |
| pifithrin                                                  | probe     |                                        |
| SB-431542                                                  | probe     | TGFBR1                                 |
| KU-0063794                                                 | probe     | MTOR                                   |
| GDC-0879                                                   | probe     | BRAF                                   |
| MLN-4924                                                   | clinical  | NAE1                                   |
| PI-103                                                     | probe     | MTOR;PIK3CA;PIK3CB;PIK3CD;PIK3CG;PRKDC |
| MK-2206                                                    | clinical  | AKT1;AKT2;AKT3                         |
| NSC95397                                                   | probe     | CDC25A;CDC25B;CDC25C                   |
| BRD8958;C646;OSSK-701387                                   | probe     | EP300                                  |
| alvocidib;flavopiridol                                     | clinical  | CDK1;CDK2;CDK4;CDK6                    |
| cisplatin;CDDP;Platin                                      | FDA       |                                        |
| tacrolimus;FK-506;fujimycin;Prograf;Advagraf;Protopic      | FDA       | PPP3CA;PPP3CB;PPP3CC;PPP3R1;PPP3R2     |
| ISOX;BRD-K69840642                                         | probe     | HDAC6                                  |
| AZD8055                                                    | clinical  | MTOR                                   |
| ibrutinib;PCI-32765                                        | clinical  | BTK                                    |
| erlotinib;CP-358774;OSI-774;NSC718781;Tarceva              | FDA       | EGFR;ERBB2                             |
| BRD-K70809902                                              | probe     | SCARB1                                 |
| masitinib;Masivet                                          | clinical  | KIT;PDGFRA;PDGFRB;FGFR3                |
| SNX-2112                                                   | probe     | HSP90AA1                               |
| Ch-55                                                      | probe     | RARA;RARB;RARG                         |
| N9-isopropylolomoucine                                     | probe     | CDK1;CDK5                              |
| 6630-29-1                                                  | probe     |                                        |
| QW-BI-011;BRD4770                                          | probe     | EHMT2;EZH2                             |
| WZ4002                                                     | probe     | EGFR                                   |
| BRD1812                                                    | probe     | CREB1;CTNNB1;CREBBP                    |
| purmorphamine                                              | probe     | SMO                                    |
| BIRB-796;Doramapimod                                       | probe     | MAPK14                                 |
| curcumin                                                   | clinical  | PPID                                   |
| UNC0321                                                    | probe     | EHMT2                                  |
| NSC632839                                                  | probe     | USP5;USP13                             |
| pazopanib;pazopanib hydrochloride;GW786034;Votrient;Armala | FDA       | KDR;FLT1;FLT4;KIT;PDGFRB               |
| BRD-K75293299                                              | GE-active |                                        |
| alisertib;MLN8237                                          | clinical  | AURKA                                  |
| XL765;SAR245409                                            | clinical  | MTOR;PIK3CA;PIK3CB;PIK3CD;PIK3CG       |
| IC-87114                                                   | probe     | PIK3CD                                 |
| JW74                                                       | probe     | CTNNB1;GSK3B;AXIN1;APC;CSKN1A1         |
| omacetaxine mepesuccinate;homoharringtonine;Synribo        | FDA       |                                        |
| YM-155                                                     | clinical  | BIRC5                                  |
| A-804598                                                   | probe     | P2RX7                                  |
| EX-527;SEN0014196                                          | clinical  | SIRT1                                  |
| vandetanib;Zactima;ZD6474;Caprelsa                         | FDA       | KDR                                    |
| entinostat                                                 | clinical  | HDAC1;HDAC2;HDAC3;HDAC6;HDAC8          |
| LY-2157299                                                 | probe     | TGFBR1                                 |
| crizotinib;PF-2341066;Xalkori                              | FDA       | ALK;MET                                |

|                                                     |           |                                 |
|-----------------------------------------------------|-----------|---------------------------------|
| BRD-K78574327                                       | GE-active |                                 |
| manumycin A                                         | probe     | FNTA;FNTB                       |
| MLN2238;MLN9708                                     | clinical  | PSMB5                           |
| GSK4112                                             | probe     | NR1D1                           |
| KHS101                                              | probe     | TACC3                           |
| PF-573228                                           | probe     | PTK2                            |
| decitabine                                          | FDA       | DNMT1                           |
| PF-543                                              | probe     | SPHK1                           |
| ML203;NCGC00185916-03;compound 58;ms-ctdd-3;BRD2993 | probe     | PKM                             |
| etimoxir                                            | clinical  | CPT1A                           |
| vorinostat;SAHA;Zolinza                             | FDA       | HDAC1;HDAC2;HDAC3;HDAC6;HDAC8   |
| silmitasertib;CX-4945                               | clinical  | CSNK2A1;CSNK2A2                 |
| tanespymycin;17-AAG                                 | clinical  | HSP90AA1                        |
| BRD-K81491172                                       | probe     | GSK3B                           |
| nilotinib;AMN107;Tasigna                            | FDA       | BCR;ABL1;KIT                    |
| parthenolide                                        | probe     |                                 |
| WZ8040                                              | probe     | EGFR                            |
| vincristine;Oncovin;leurocristine                   | FDA       | TUBB1                           |
| navitoclax                                          | clinical  | BCL2;BCL2L1;BCL2L2              |
| PF-750                                              | probe     | FAAH                            |
| CAY10618                                            | probe     | NAMPT                           |
| PL-DI;piperlongumine-dimer                          | probe     |                                 |
| skepinone-L                                         | probe     | MAPK14                          |
| nelarabine                                          | FDA       | POLA1                           |
| CBB-1007                                            | probe     | KDM1A                           |
| BRD-K84807411                                       | GE-active |                                 |
| sirolimus;rapamycin;Rapamune                        | FDA       | MTOR                            |
| spautin-1                                           | probe     | USP10;USP13                     |
| BRD-K85133207                                       | probe     | HDAC1                           |
| neratinib;HKI-272                                   | clinical  | EGFR;ERBB2                      |
| AZD7762                                             | clinical  | CHEK1;CHEK2                     |
| BRD-K86535717                                       | GE-active |                                 |
| BRD4132                                             | probe     | MYC                             |
| bafilomycin                                         | probe     | ATP6V0A1                        |
| UNC0638                                             | probe     | EHMT1;EHMT2                     |
| cediranib;AZD2171                                   | clinical  | FLT1;KDR;FLT4                   |
| OSI-027                                             | clinical  | MTOR;RPTOR;MLST8;RICTOR;MAPKAP1 |
| veliparib;ABT-888                                   | clinical  | PARP1;PARP2                     |
| L-685458                                            | probe     | NCSTN;PSEN1;PSENEN;APH1A        |
| CYT-387                                             | clinical  | JAK1;JAK2                       |
| istradefylline;KW-6002                              | clinical  | ADORA2A                         |
| fingolimod;FTY720;Gilenya                           | FDA       | S1PR1                           |
| bortezomib                                          | FDA       | PSMD1;PSMD2;PSMB1;PSMB2;PSMB5   |
| CI-976                                              | probe     | ACAT1                           |
| BRD-K88742110                                       | probe     | HDAC8                           |

|                                            |           |                            |
|--------------------------------------------|-----------|----------------------------|
| tandutinib;MLN518;CT53518                  | clinical  | FLT3;KIT;PDGFRB            |
| BRD9876                                    | probe     | WEE1                       |
| RG-108                                     | probe     | DNMT1                      |
| ML006;T6748133;BRD2698                     | probe     | S1PR3                      |
| trifluoperazine;Stelazine                  | FDA       | DRD2                       |
| GW-843682X                                 | probe     | PLK1;PLK3                  |
| pitstop2                                   | probe     | CLTA;CLTB;CLTC;CLTCL1      |
| bosutinib;SKI-606;Bosulif                  | FDA       | SRC;ABL1                   |
| MI-2                                       | probe     | MEN1;MLL                   |
| O-6-benzylguanine                          | clinical  | AGXT                       |
| doxorubicin;adriamycin;hydroxydaunorubicin | FDA       | TOP2A                      |
| tosedostat;CHR-2797                        | clinical  | LAP3;NPEPPS;ANPEP          |
| GSK461364                                  | clinical  | PLK1                       |
| bexarotene;Targretin                       | FDA       | RXRA;RXRB;RXRG             |
| imatinib;STI571;Gleevec                    | FDA       | BCR;ABL1                   |
| BRD-K92856060                              | probe     |                            |
| SMER-3                                     | probe     | SKP1;CUL1                  |
| PAC-1                                      | probe     | CASP3                      |
| SJ-172550                                  | probe     | TP53;MDM2                  |
| RAF265;CHIR-265                            | clinical  | BRAF;KDR                   |
| AC55649                                    | probe     | RARB                       |
| BRD-K98948170                              | probe     |                            |
| vorapaxar;SCHá530348                       | clinical  | F2R                        |
| tamoxifen;Nolvadex;Istubal;Valodex         | FDA       | ESR1;ESR2                  |
| quizartinib;AC220                          | clinical  | FLT3                       |
| CHM-1                                      | probe     |                            |
| VAF-347                                    | probe     | AHR                        |
| BRD-K96431673                              | GE-active |                            |
| pifithrin-mu;NSC303580                     | probe     | TP53;HSPA1A;HSPA1B;HSPA1L  |
| BRD-K96970199                              | GE-active |                            |
| GSK-J4                                     | probe     | KDM6A;KDM6B                |
| 16-beta-bromoandrosterone                  | probe     | PTGER3;PTGER4              |
| pluripotin                                 | probe     | MAPK3;RASA1                |
| JW-480                                     | probe     | NCEH1                      |
| linifanib;ABT-869                          | clinical  | KDR;FLT1;FLT3;CSF1R;PDGFRB |
| Infinity compound 1                        | probe     | BCL2                       |
| oxaliplatin;Eloxatin                       | FDA       |                            |

**Supplementary Table 11: AUCs <0.5 of CLF-PED-015-T to Broad CTD2 440 compound plates**

| <b>Compound</b>           | <b>CLF-PED-015-T passage 13</b> | <b>Target</b>                     |
|---------------------------|---------------------------------|-----------------------------------|
| daporinad                 | 0.13409                         | NAMPT                             |
| avicin D                  | 0.16323                         | AMPK                              |
| narciclasine              | 0.18794                         | GTPase alkaloid                   |
| leptomycin B              | 0.21489                         | XPO1                              |
| bortezomib                | 0.22442                         | Proteosome inhibitor              |
| GMX-1778                  | 0.23613                         | NAMPT                             |
| PL-DI                     | 0.26869                         | ROS                               |
| MST-312                   | 0.28937                         | TERT                              |
| brefeldin A               | 0.29439                         | Anterograde transport             |
| YM-155                    | 0.30169                         | BIRC5                             |
| SN-38                     | 0.30502                         | TOP1                              |
| LBH-589                   | 0.3064                          | HDAC                              |
| triptolide                | 0.31202                         | Unknown                           |
| omacetaxine mepesuccinate | 0.33426                         | Protein translation               |
| dinaciclib                | 0.34462                         | CDK inhibitor                     |
| ouabain                   | 0.3555                          | Na/K atpase                       |
| alvocidib                 | 0.36712                         | CDK inhibitor                     |
| BI-2536                   | 0.39749                         | PLK                               |
| SMER-3                    | 0.41192                         | SCFMET30                          |
| PF-3758309                | 0.41405                         | PAK                               |
| doxorubicin               | 0.41495                         | TOP2A                             |
| vincristine               | 0.42718                         | Inhibitor of microtubule assembly |
| topotecan                 | 0.43789                         | TOP1                              |
| KX2-391                   | 0.44497                         | SRC inhibitor                     |
| SNS-032                   | 0.46309                         | CDK inhibitor                     |
| parbendazole              | 0.46443                         | Inhibitor of microtubule assembly |
| BRD-K30748066             | 0.49157                         | Unknown                           |
| cucurbitacin I            | 0.49487                         | STAT3/JAK2                        |
| CAY10618                  | 0.49708                         | NAMPT                             |
| AT13387                   | 0.49832                         | HSP90                             |
| bardoxolone methyl        | 0.49887                         | IKK                               |

**Supplementary Table 12: Primers for fusion validation by qRT-PCR**

| <b>Fusion Name</b> | <b>Primer pair (5'-3')</b>                        |
|--------------------|---------------------------------------------------|
| RPS24-EMP1         | TTGGTGGTGGCAAGACAAC<br>GGCTGTCACTGCAGCTAATG       |
| VEGFA-DTNB         | TCACCAAGGCCAGCACATAG<br>CCATGGGTGGGCGATGTATG      |
| UBXN7-GRID2        | AGCTGATGTTGCGGTATCCA<br>AGGGCCAAGATGCCTTGATT      |
| IGF2BP2-AMFR       | AGGTAAAGTGGAATTGCATGGG<br>CTCACTCACTCGAAGAGGGC    |
| FUS-GABRA3         | TGCTCAGAGCGGAGAAAGC<br>GCGATGTATGTGGTGACCCT       |
| FSD1-CLSTN2        | GCATCCGGCAGACAGAGTACA<br>GCCCTCTCCTGATGTCTTGTT    |
| GALNT7-PDLIM1      | GTGGTCCTCTGGTCTTCCCTG<br>TTCTTTGTCGATGACAAGGCTG   |
| PRKCH-ALPK2        | GGGTAAATGCGGTGGAACCTG<br>CCCCAAAGTAGCTGTCATGGAG   |
| ZNF680-XPA         | GCCCTGGAATAGGAAGAGACAG<br>CCCTTTTCCACACGCTGCTT    |
| TMED10-ITPR2       | AGGAGATTCACAAGGACCTGCTA<br>TGAACAGTTCTCCTTGGCACAT |
| GAPDH              | GAAGGTGAAGGTCCGAGTC<br>GAAGATGGTGATGGGATTTT       |
| TBP                | TTCGGAGAGTTCTGGGATTGTA<br>TGGACTGTTCTTCACTCTTGGC  |

**Supplementary Table 13: shRNA/sgRNA constructs used for validation**

**shRNA**

| Clone ID       | Target Gene | Gene Symbol | Taxon   | Target Region | Target Seq            |
|----------------|-------------|-------------|---------|---------------|-----------------------|
| TRCN0000297275 | 1019        | CDK4        | human   | 3UTR          | CCTTCCCATTTCTCTACACTA |
| TRCN0000279887 | 1019        | CDK4        | human   | CDS           | GTGGAGTGTGGCTGTATCTT  |
| TRCN0000279953 | 1019        | CDK4        | human   | CDS           | ACAGTTCGTGAGGTGGCTTTA |
| TRCN0000279952 | 1019        | CDK4        | human   | 3UTR          | GAGATTACTTTGCTGCCTTAA |
| TRCN0000338462 | 7514        | XPO1        | human   | CDS           | GCTCAAGAAGTACTGACACAT |
| TRCN0000338401 | 7514        | XPO1        | human   | CDS           | ATTCGACTTGCCTACTCAAAT |
| TRCN0000338399 | 7514        | XPO1        | human   | CDS           | CCTCACCTACAAGATGCTCAA |
| TRCN0000072213 | -12         | RFP         | CONTROL | CDS           | ACTACACCATCGTGGAACAGT |
| TRCN0000231725 | -12         | RFP         | CONTROL | CDS           | ACTACACCATCGTGGAACAGT |
| TRCN0000072254 | -14         | LUCIFERASE  | CONTROL | CDS           | ATGTTTACTACTCGGATAT   |
| TRCN0000231737 | -14         | LUCIFERASE  | CONTROL | CDS           | ATGTTTACTACTCGGATAT   |
| TRCN0000072225 | -15         | lacZ        | CONTROL | CDS           | CTCTGGCTAACGGTACGCGTA |

| Clone ID              | Target Gene | Known seed?                            | shRNA label   | Gene        |
|-----------------------|-------------|----------------------------------------|---------------|-------------|
| <b>TRCN0000279953</b> | <b>1019</b> | <b>Seed pair 1*<br/>no seed effect</b> | <b>CDK4-1</b> | <b>CDK4</b> |
| TRCN0000279952        | 1019        | Seed pair 4                            | CDK4-2        | CDK4        |
| TRCN0000279887        | 1019        | Seed pair 6                            | CDK4-3        | CDK4        |
| <b>TRCN0000297275</b> | <b>1019</b> | <b>Not in list</b>                     | <b>CDK4-4</b> | <b>CDK4</b> |
|                       |             |                                        |               |             |
| <b>TRCN0000338401</b> | <b>7514</b> | <b>Seed pair 2*<br/>no seed effect</b> | <b>XPO1-1</b> | <b>XPO1</b> |
| TRCN0000338462        | 7514        | Seed pair 4                            | XPO1-3        | XPO1        |
| <b>TRCN0000338399</b> | <b>7514</b> | <b>Not in list</b>                     | <b>XPO1-4</b> | <b>XPO1</b> |
|                       |             |                                        |               |             |

**sgRNA**

| Gene Symbol    | Taxon | Target Seq                |
|----------------|-------|---------------------------|
| TP53 (clone 3) | human | CACCGCCCCTTGCCGTCCCAAGCAA |
| GFP (clone 3)  |       | AGCTGGACGGCGACGTAAAG      |
